# Supplementary material for: Phage display and selection of lanthipeptides on the carboxy-terminus of the gene-3 minor coat protein
Source: PubMed Central journal article supplement (PMC5686179; doi:10.1038/s41467-017-01413-7), 2017-11-15
Supplement: 41467_2017_1413_MOESM1_ESM.pdf [file 41467_2017_1413_MOESM1_ESM.pdf]

## Supplementary Figure 1

**a**

| Reporter peptides (cycle size) | Core sequence                                 |
|--------------------------------|-----------------------------------------------|
| Nis-6 and Proc-6 (i, i+7)      | A <u>SW</u> <u>IEG</u> R E C N                |
| Nis-9 and Proc-9 (i, i+10)     | A <u>SWAA</u> <u>IEG</u> R A E C N            |
| Nis-12 and Proc-12 (i, i+13)   | A <u>SWAAA</u> <u>IEG</u> R A A A E C N       |
| Nis-16 and Proc-16 (i, i+17)   | A <u>SWAAGAA</u> <u>IEG</u> R A A G A A E C N |

**b**

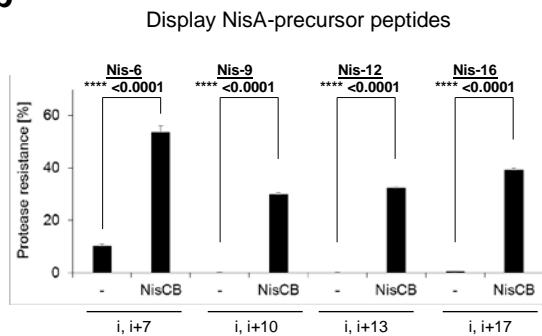

**c**

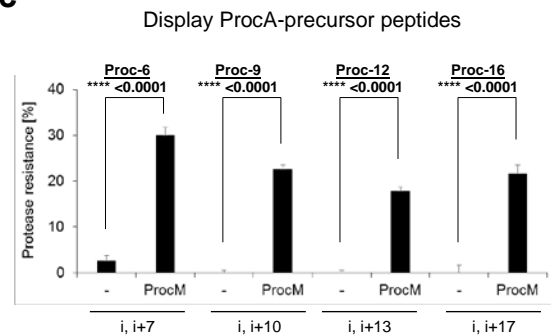

**Supplementary Figure 1** Display of reporter peptides with increased monocycle size on the C-terminus of phage pIII. (a) Cycle size and sequence of tested core peptides. Residues involved in thioether formation are colored, the FXa-site is underlined. (b) ELISA-based FXa-cleavage reporter assay performed on phage particles displaying indicated peptide sequences (full sequences in Supplementary Table 3) fused to the NisA-leader and produced with or without NisBC co-expression. The protease resistance relative to untreated (no FXa) samples was calculated and data representing mean  $\pm$  s.d. of three independent phage preparations analyzed in duplicate is shown (unpaired, two-tailed *t*-test). (c) As in (b), but phage displayed model peptides containing ProcA leader sequences (full sequences in Supplementary Table 4) were tested after phage production with or without ProcM co-expression. The experiments shown in panel b and c were repeated twice.

## Supplementary Figure 2

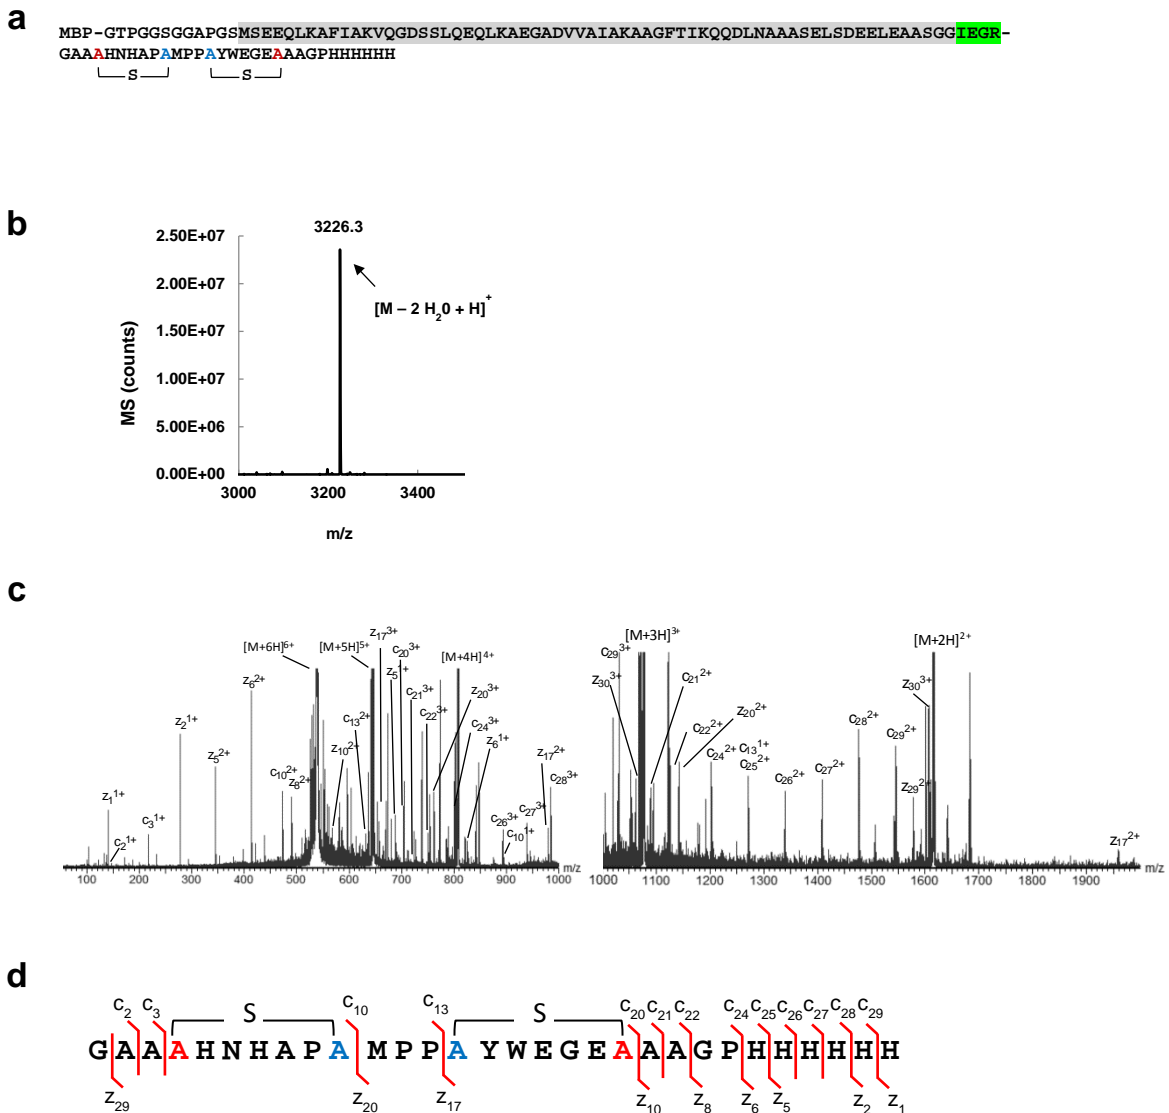

**Supplementary Figure 2** Production and analytics of leader peptide-free ProcA2.8 expressed as C-terminal fusion to MBP. (a) ProcA2.8 was expressed from plasmid pET21a\_MBP\_PEP226 as C-terminal fusion to MBP with an FXa-site (green sequence) inserted in the leader (gray sequence)-core junction and with co-expression of ProcM. MBP and the leader peptide were proteolytically removed by FXa treatment and the resulting His<sub>6</sub>-tagged core peptide purified by IMAC prior to analysis. (b) The ESI mass spectra is shown with the main peak peptide mass reflecting the two fold dehydrated core peptide (indicated by an arrow). (c) ETD spectra and assignment of c and z fragments of leader free ProcA2.8 in the ranges of  $m/z^{-1}$  100-1000 (left panel) and  $m/z^{-1}$  1000-2000 (right panel). (d) Sequence of leader free ProcA2.8 and lanthionine structure derived from ETD data. Fragments found under ETD conditions (as detailed in Supplementary Tables 7, 8) are depicted above (c series) and below (z series) the sequence.

## Supplementary Figure 3

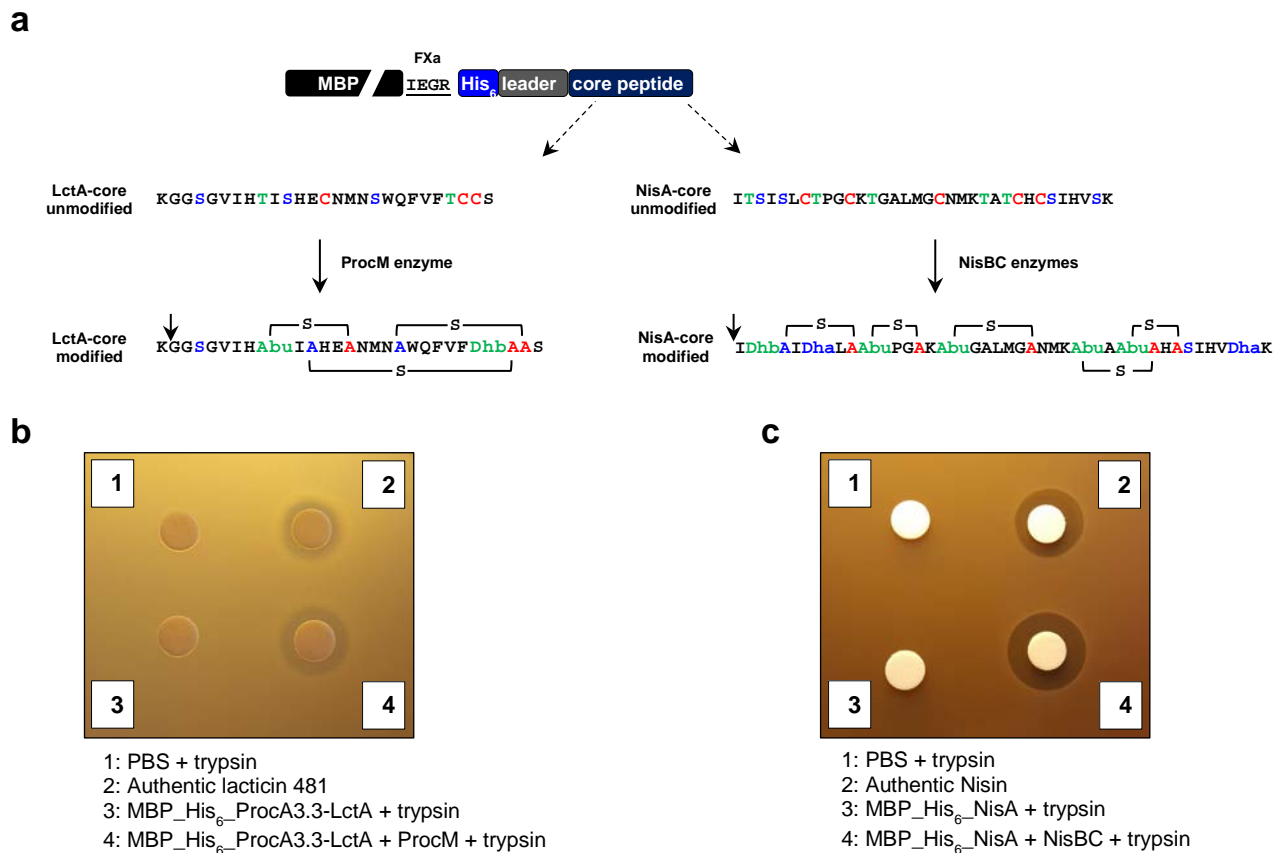

**Supplementary Figure 3** Bioactivity assay of lanthipeptides produced as C-terminal fusions to MBP. (a) Schematic drawing of the MBP-fusion vector used for expression of a chimeric peptide consisting of the ProcA3.3 leader sequence fused to the core of LctA (left panel) and NisA (right panel; full sequences shown in Supplementary Table 5). The sequence of the unmodified and modified core peptides as reported in the literature are indicated<sup>1</sup>. The arrow indicates a trypsin cleavage site used to release the mature core peptide. (b) Growth inhibition of lactacin 481-sensitive *L. lactis cremonis* (HP) by filter-disc spotted peptide solutions. (1) Trypsin treated PBS (negative control); (2) authentic lactacin 481 (positive control); (3) ProcA3.3-LctA produced as C-terminal MBP fusion in *E. coli* without ProcM co-expression and treated with trypsin; (4) ProcA3.3-LctA produced as C-terminal MBP fusion in *E. coli* with ProcM co-expression and treated with trypsin. (c) Growth inhibition of nisin-sensitive *L. lactis* NZ9000 by filter-disc spotted peptide solutions. (1) Trypsin treated PBS (negative control); (2) authentic nisin (positive control); (3) NisA produced as C-terminal MBP fusion in *E. coli* without NisBC co-expression and treated with trypsin; (4) NisA produced as C-terminal MBP fusion in *E. coli* with NisBC co-expression and treated with trypsin.

## Supplementary Figure 4

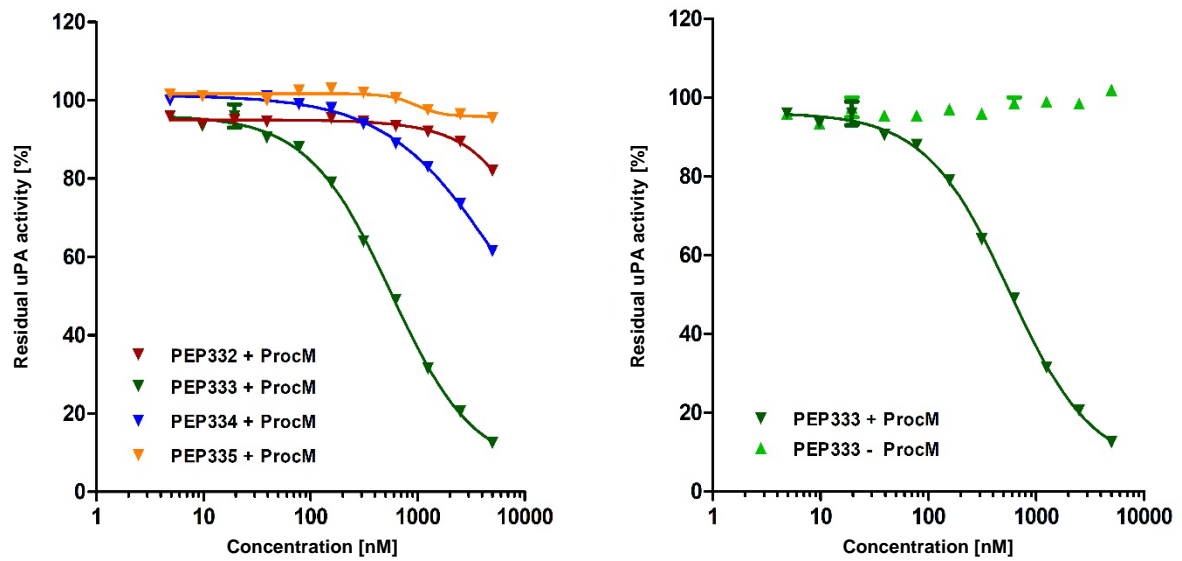

**Supplementary Figure 4** Inhibitory activity of anti-uPA lanthipeptides. **(a)** Residual activities of human uPA incubated with ProcM-modified anti-uPA leader-core peptides PEP332 to PEP335 as indicated. **(b)** As in (a), but residual activities of human uPA incubated with PEP333 produced with (+ ProcM) or without (- ProcM) ProcM co-expression. The inhibitory constant  $K_i$  of PEP333 is 564 nM and was calculated as recently described<sup>2</sup>. The experiment was repeated three times.

## Supplementary Figure 5

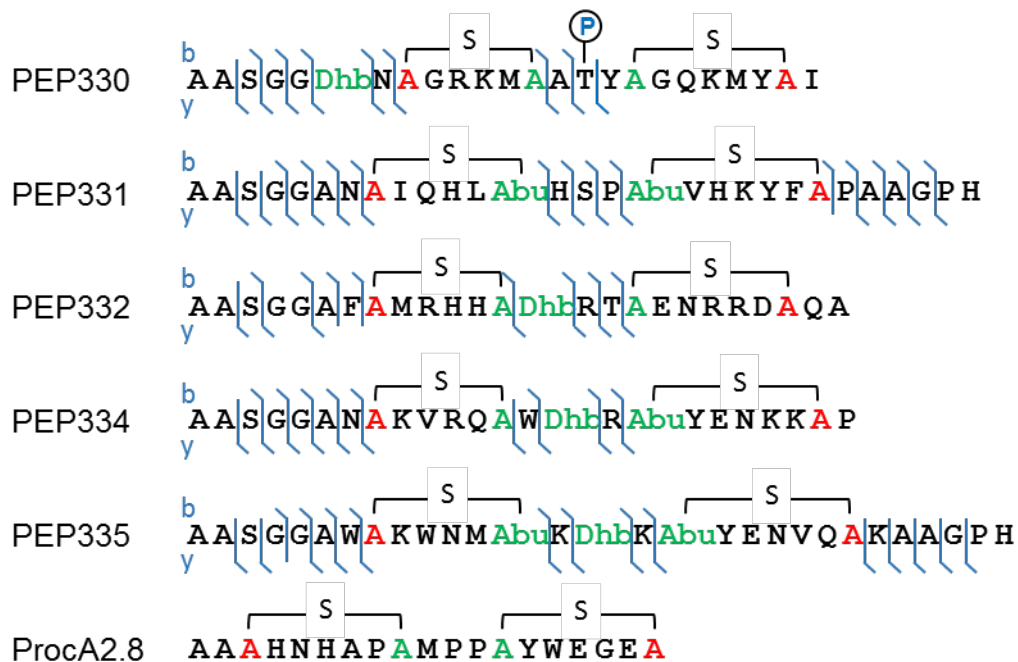

**Supplementary Figure 5** Proposed thioether configuration of five ProcM-modified peptides selected by phage display. For comparison the reported structure of the natural substrate ProcA2.8 is shown<sup>3</sup>, which inspired the library design used in this study. Thioether-bridges are formed by bridging of a cysteine (A; in red) to a dehydroalanine Dha (resulting in A; in green) or a dehydrobutyrine Dhb (resulting in aminobutyrate Abu). The proposed structures are deduced from the MS data shown in Supplementary Table 9 and the MS/MS data shown in Supplementary Tables 10 – 15. The N-terminal ProcA3.3 leader was partially removed by Glu-C digestion and the linker-His<sub>6</sub>-tag was partially removed by treatment with carboxypeptidase Y prior to MS/MS analysis. The remaining sequences and their ring structures are shown. The observed phosphorylation (P) of PEP330 was proven to be in between the two lanthionine rings (Supplementary Tables 9, 13 and 14). Phosphorylation is an observed intermediate in the dehydration reaction of Ser and Thr by ProcM<sup>4</sup>. The Ser residue in PEP331, which is also located in between the lanthionine rings, escapes dehydration and is not phosphorylated. PEP332, PEP334 and PEP335 have a dehydrobutyrine in between the lanthionine rings demonstrating that dehydration is sequence and structure dependent. In blue the b- and y-ions are shown from Supplementary Tables 10 – 15. The thioether configuration in PEP333 could not be unambiguously identified and is currently under further investigation.

## Supplementary Figure 6

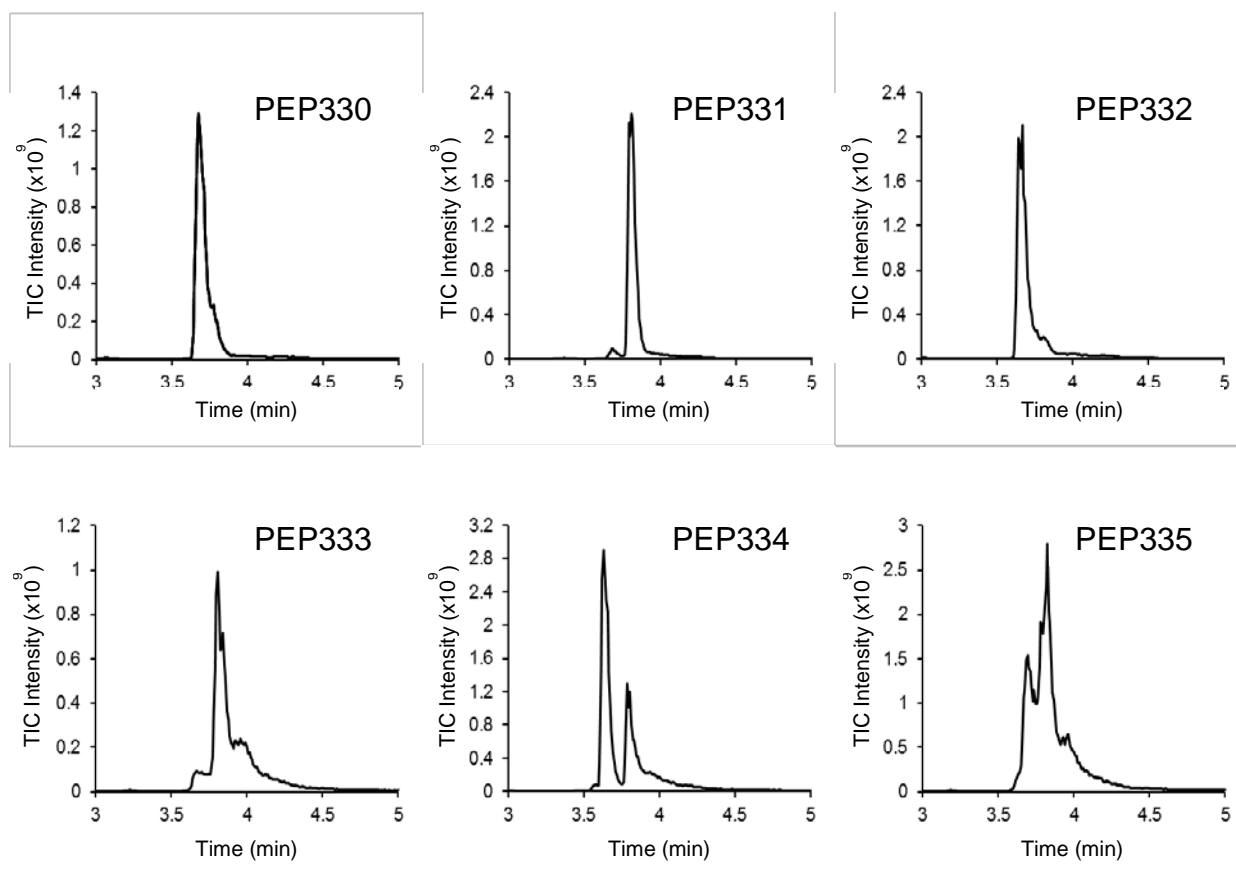

**Supplementary Figure 6** UPLC profiles of phage-selected lanthipeptides analyzed as leader-core peptides with C-terminal His<sub>6</sub>-tag. The data were collected by using a gradient from 5 to 95% acetonitrile in water with 0.1% formic acid over 10 min at a flow rate of 0.3 ml min<sup>-1</sup> on an Acquity UPLC Protein BEH C18 column (2.1 mm x 50 mm, Waters). The time course of elution was detected with Total Ion Current (TIC) Intensity.

## Supplementary Figure 7

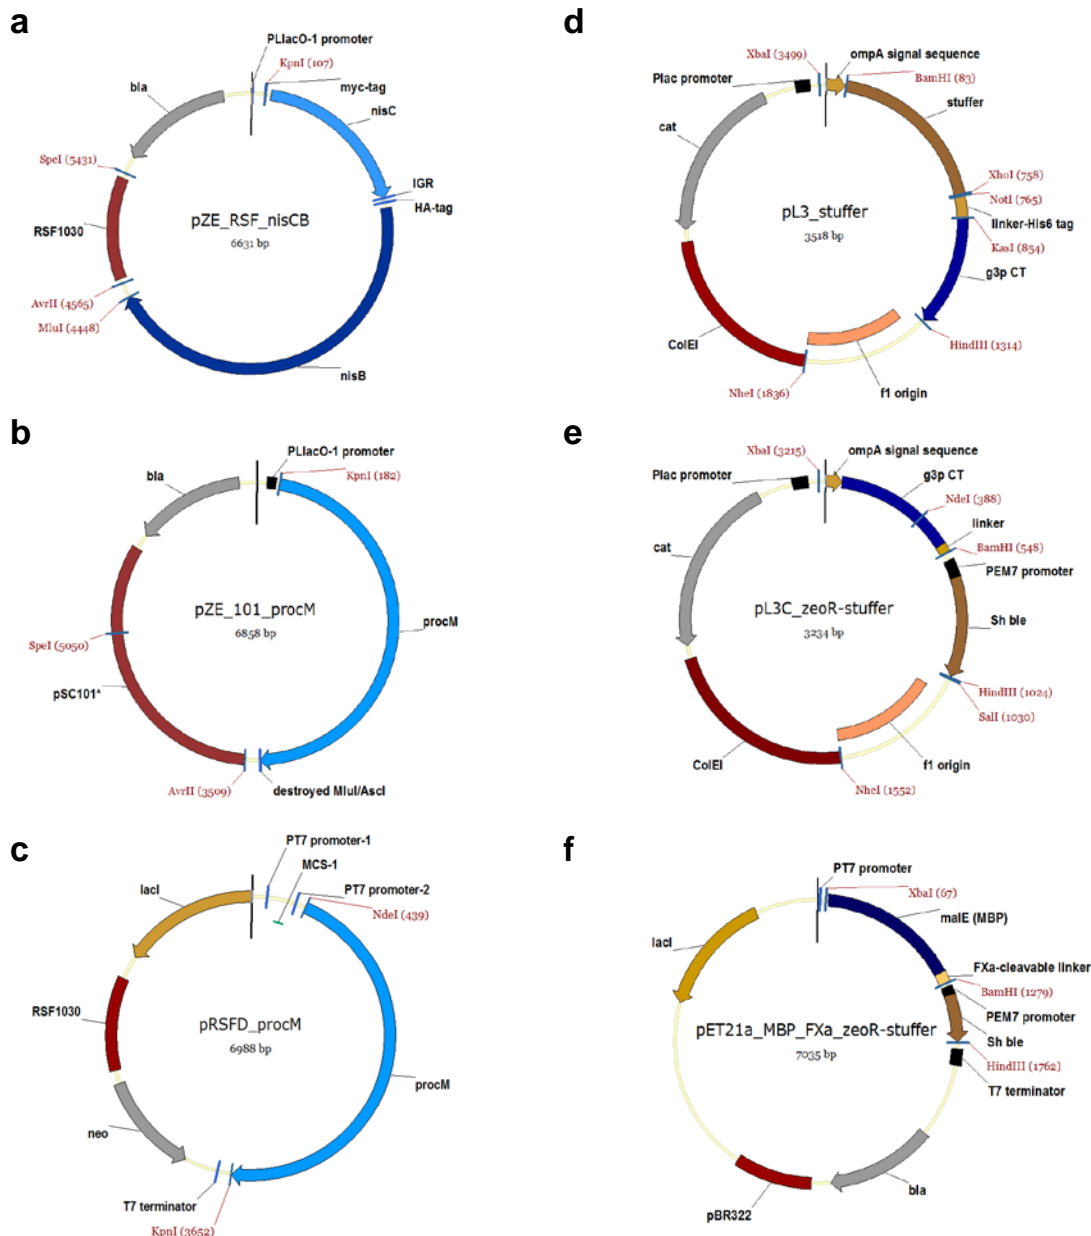

**Supplementary Figure 7** Vector maps of plasmids used in this study. **(a)** pZE\_RSF\_nisCB: Expression of a bicistronic operon encoding *L. lactis nisC* and *nisB* genes with N-terminal *myc*-, and HA-tags, respectively, from an inducible PLlacO-1 promoter. **(b)** pZE\_101\_procM: Expression of *Prochlorococcus* MIT9313 *procM* from an inducible PLlacO-1 promoter. **(c)** pRSF\_procM: Expression of *Prochlorococcus* MIT9313 *procM* from an inducible T7 promoter. **(d)** pL3\_stuffer: Plasmid/phagemid for expression of peptide fusions to the N-terminus of pIII from an inducible Plac promoter and with an f1 origin for single strand DNA production. **(e)** pL3C\_zeoR-stuffer: Plasmid/phagemid with same features as (d), but for expression of peptide fusions to the C-terminus of pIII. **(f)** pET21a\_MBP\_FXa\_zeoR-stuffer: Expression of peptide fusions to the C-terminus of *malE* (MBP) via an FXa-cleavable linker from an inducible T7 promoter. Genes: *bla*, *neo*, *cat* conferring ampicillin, kanamycin, and chloramphenicol resistance, respectively. *lacI*: lac repressor. Replicons: RSF1030 (100 copies/cell), ColE1 (~ 20 copies/cell), pBR322 (~ 20 copies/cell), pSC101\* (3-4 copies/cell).

## Supplementary Table 1

### Amino acid sequence of NisA-leader containing model lanthi-precursor peptides expressed from pL3\_stuffer derivatives

OmpA(1-21) : : GGGGSAHKHKHKPGSGGAPGSMSTKDFNLDLVSVSKKDSGASPR : : XXX<sup>a</sup>

|                            |                                                                                |
|----------------------------|--------------------------------------------------------------------------------|
| pL_Nis-6 <sup>b</sup>      | PAGDYKDDDDKA <u>SW</u> <b><u>IEGRE</u></b> CNAAAGPHHHHHH <sup>c</sup>          |
| pL_Nis-6-S36T <sup>b</sup> | PAGDYKDDDDKA <u>TW</u> <b><u>IEGRE</u></b> CNAAAGPHHHHHH <sup>c</sup>          |
| pL_Nis-6-S36A <sup>b</sup> | PAGDYKDDDDKA <u>AW</u> <b><u>IEGRE</u></b> CNAAAGPHHHHHH <sup>c</sup>          |
| pL_Nis-6-C43A <sup>b</sup> | PAGDYKDDDDKA <u>SW</u> <b><u>IEGRE</u></b> <u>A</u> CNAAAGPHHHHHH <sup>c</sup> |

<sup>a</sup> The N-terminal sequence shared by all constructs is comprised of the OmpA signal sequence (OmpA residues 1-21) fused to a linker sequence containing an (HK)<sub>3</sub>-repeat for improved expression and the natural NisA-leader sequence (underlined); XXX indicates core peptide sequences as shown in the individual rows below.

<sup>b</sup> Plasmid trivial name used in this study.

<sup>c</sup> Core peptide sequence with FLAG- and His<sub>6</sub>-tags used for ELISA capture/detection (shaded), FXa-site (bold, underlined), and relevant residues for thioether-bridge formation (double-underlined).

## Supplementary Table 2

### Amino acid sequence of ProcA-leader containing model lanthi-precursor peptides expressed from pL3\_stuffer derivatives

OmpA(1-21) : :

GGGGSAHKHKHKPGSGGAPGSMSEEQLKAFIAKVQGDSSLQEQKAEADVVAIAKAAGFTIKQQDLNAAASELSDEELEAASGG : : XXX<sup>a</sup>

|                             |                                                                                |
|-----------------------------|--------------------------------------------------------------------------------|
| pL_Proc-6 <sup>b</sup>      | PAGYPYDVPDYA <u>SW</u> <b><u>IEGRE</u></b> CNAAAGPHHHHHH <sup>c</sup>          |
| pL_Proc-6-S77T <sup>b</sup> | PAGYPYDVPDYA <u>TW</u> <b><u>IEGRE</u></b> CNAAAGPHHHHHH <sup>c</sup>          |
| pL_Proc-6-S77A <sup>b</sup> | PAGYPYDVPDYA <u>AW</u> <b><u>IEGRE</u></b> CNAAAGPHHHHHH <sup>c</sup>          |
| pL_Proc-6-C84A <sup>b</sup> | PAGYPYDVPDYA <u>SW</u> <b><u>IEGRE</u></b> <u>A</u> CNAAAGPHHHHHH <sup>c</sup> |

<sup>a</sup> The N-terminal sequence shared by all constructs is comprised of the OmpA signal sequence (OmpA residues 1-21) fused to a linker sequence containing an (HK)<sub>3</sub>-repeat for improved expression and the natural ProcA3.3-leader sequence (underlined); XXX indicates core peptide sequences as shown in the individual rows below.

<sup>b</sup> Plasmid trivial name used in this study.

<sup>c</sup> Core peptide sequence with HA- and His<sub>6</sub>-tags used for ELISA capture/detection (shaded), FXa-site (bold, underlined), and relevant residues for thioether-bridge formation (double-underlined).



### Supplementary Table 3

#### Amino acid sequence of NisA-leader containing model lanthi-precursor peptides displayed on phage pIII CT and expressed from pL3\_stuffer, or pL3C\_zeoR-stuffer derivatives

OmpA(1-21)::GGGGSAGSMSTKDFNLDLVSVSKKDSGASPR::XXX::GGGDSRGGGAAGGGDSRGGGA::pIII CT (275-424)<sup>a</sup>

pL3\_Nis-6<sup>c</sup> PAGDYKDDDDKASWIEGRECNAAAGPHHHHHH<sup>d</sup>

OmpA(1-21)::pIII CT (275-424)::YSSAETDRSAPMSTKDFNLDLVSVSKKDSGASPR::XXX<sup>b</sup>

pL3C\_Nis-6<sup>c</sup> PAGDYKDDDDKASWIEGRECNAAAGPHHHHHH<sup>d</sup>

pL3C\_Nis-6-S36A<sup>c</sup> PAGDYKDDDDKAAWIEGRECNAAAGPHHHHHH<sup>d</sup>

pL3C\_Nis-6-C43A<sup>c</sup> PAGDYKDDDDKASWIEGREANAAAGPHHHHHH<sup>d</sup>

pL3C\_Nis-9<sup>c</sup> PAGDYKDDDDKASWAAIEGRAECNAAAGPHHHHHH<sup>d</sup>

pL3C\_Nis-12<sup>c</sup> PAGDYKDDDDKASWAAAIEGRAAAECNAAAGPHHHHHH<sup>d</sup>

pL3C\_Nis-16<sup>c</sup> PAGDYKDDDDKASWAAGAAIEGRAAGAAECNAAAGPHHHHHH<sup>d</sup>

<sup>a</sup> Model lanthi-precursor peptide fusion to the N-terminus of pIII is comprised of the OmpA signal sequence (OmpA residues 1-21), a short linker, the NisA-leader (underlined), the core sequence (indicated by XXX; sequence in the row below), a linker, and residues 275-424 of phage pIII.

<sup>b</sup> The sequence shared by all lanthi-precursor peptides fused to the C-terminus of pIII is comprised of the OmpA signal sequence (OmpA residues 1-21), residues 275-424 of phage pIII, a linker sequence, and the NisA-leader (underlined); XXX indicates core peptide sequences as shown in the individual rows below.

<sup>c</sup> Plasmid trivial name used in this study.

<sup>d</sup> Core peptide sequence with FLAG- and His<sub>6</sub>-tags (shaded), FXa-site (bold, underlined), and relevant residues for thioether-bridge formation (double-underlined).

### Supplementary Table 4

#### Amino acid sequence of ProcA-leader containing model lanthi-precursor peptides displayed on phage pIII CT and expressed from pL3\_stuffer, or of pL3C\_zeoR-stuffer derivatives

OmpA(1-21)::GGGGSAGSMSEEQLKAFIAKVQGDSSLQEQLKAEGADVVAIAKAAGFTIKQQLNAAASELSDEELEAASGG::XXX::GGGDSRGGGAAGGGDSRGGGA::pIII CT (275-424)<sup>a</sup>

pL3\_Proc-6<sup>c</sup> PAGYPYDVPDYASWIEGRECNAAAGPHHHHHH<sup>d</sup>

OmpA(1-21)::pIII CT (275-424)::YSSAETDRSAPGSMSEEQLKAFIAKVQGDSSLQEQLKAEGADVVAIAKAAGFTIKQQLNAAASELSDEELEAASGG::XXX<sup>b</sup>

pL3C\_Proc-6<sup>c</sup> PAGYPYDVPDYASWIEGRECNAAAGPHHHHHH<sup>d</sup>

pL3C\_Proc-6-S77A<sup>c</sup> PAGYPYDVPDYAAWIEGRECNAAAGPHHHHHH<sup>d</sup>

pL3C\_Proc-6-C84A<sup>c</sup> PAGYPYDVPDYASWIEGREANAAAGPHHHHHH<sup>d</sup>

pL3C\_Proc-9<sup>c</sup> PAGYPYDVPDYASWAAIEGRAECNAAAGPHHHHHH<sup>d</sup>

pL3C\_Proc-12<sup>c</sup> PAGYPYDVPDYASWAAAIEGRAAAECNAAAGPHHHHHH<sup>d</sup>

pL3C\_Proc\_16<sup>c</sup> PAGYPYDVPDYASWAAGAAIEGRAAGAAECNAAAGPHHHHHH<sup>d</sup>

<sup>a</sup> Model lanthi-precursor peptide fusion to the N-terminus of pIII is comprised of the OmpA signal sequence (OmpA residues 1-21), a short linker, the ProcA3.3-leader (underlined), the core sequence (indicated by XXX; sequence in the row below), a linker, and residues 275-424 of phage pIII.

<sup>b</sup> The sequence shared by all lanthi-precursor peptides fused to the C-terminus of pIII is comprised of the OmpA signal sequence (OmpA residues 1-21), residues 275-424 of phage pIII, a linker sequence, and the ProcA3.3-leader (underlined); XXX indicates core peptide sequences as shown in the individual rows below.

<sup>c</sup> Plasmid trivial name used in this study.

<sup>d</sup> Core peptide sequence with HA- and His<sub>6</sub>-tags (shaded), FXa-site (bold, underlined), and relevant residues for thioether-bridge formation (double-underlined).

**Supplementary Table 5**

**Amino acid sequence of ProcA-leader containing lanthi-precursor peptides fused to the C-terminus of MBP and expressed from pET21a\_MBP\_FXa\_zeoR-stuffer derivatives**

MBP (Met, 27-391)NSSSNNNNNNNNNNGTIEGRGSPGGSGGAPGS : : XXX<sup>a</sup>  
MSEEQLKAFIAKVQGDSSLQEQLKAEGADVVAIAKAAGFTIKQQDLNAAASELSDEELEAASGG : : XXX<sup>a</sup>

|                                   |                                                          |
|-----------------------------------|----------------------------------------------------------|
| pET21a_MBP_ProcA1.1 <sup>b</sup>  | FFCVQGTANRFTINVCAAAGPHHHHHH <sup>c</sup>                 |
| pET21a_MBP_ProcA2.8 <sup>b</sup>  | AACHNHAPSMPPSYWEGECAAGPHHHHHH <sup>c</sup>               |
| pET21a_MBP_ProcA2.11 <sup>b</sup> | GRIDTCPAGGGTSEQTGTCCAAAGPHHHHHH <sup>c</sup>             |
| pET21a_MBP_PEP226 <sup>b</sup>    | <u>IEGR</u> GAAACHNHAPSMPPSYWEGECAAGPHHHHHH <sup>c</sup> |
| pET21a_MBP_PEP330 <sup>b</sup>    | TNCGRKMSATYSGQKMYCIAAGPHHHHHH <sup>c</sup>               |
| pET21a_MBP_PEP331 <sup>b</sup>    | ANCIQHLLTHSPTVHKYFCPAAGPHHHHHH <sup>c</sup>              |
| pET21a_MBP_PEP332 <sup>b</sup>    | AFCMRHHSTRTSENRRDCAAGPHHHHHH <sup>c</sup>                |
| pET21a_MBP_PEP333 <sup>b</sup>    | AICQIADATRTGENRKCLAAGPHHHHHH <sup>c</sup>                |
| pET21a_MBP_PEP334 <sup>b</sup>    | ANCKVRQSWTRTYENKKCPAAGPHHHHHH <sup>c</sup>               |
| pET21a_MBP_PEP335 <sup>b</sup>    | AWCKWNMTKTKTYENVQCKAAGPHHHHHH <sup>c</sup>               |

**Amino acid sequence of antimicrobial lantibiotic precursor peptides fused to the C-terminus of MBP and expressed from pET21a\_MBP\_FXa\_zeoR-stuffer derivatives**

MBP (Met, 27-391)NSSSNNNNNNNNNNGTIEGRGSPGGSGGAPGS : : XXX<sup>d</sup>

|                                                         |                                                                                                                          |
|---------------------------------------------------------|--------------------------------------------------------------------------------------------------------------------------|
| pET21a_MBP_His <sub>6</sub> _ProcA3.3-LctA <sup>b</sup> | HHHHHHGTDPNMSSEEQLKAFIAKVQGDSSLQEQLKAEGADVVAIAKAAGFTIKQQDLN<br>AAASELSDEELEAASGGKGGSGVIHTISHECNMNSWQFVFTCCS <sup>e</sup> |
| pET21a_MBP_His <sub>6</sub> _NisA <sup>b</sup>          | HHHHHHGTMSTKDFNLDLVSVKKDSGASPRITISISLCTPGCKTGALMGCNMKTATCHC<br>SIHVSK <sup>e</sup>                                       |

<sup>a</sup> The N-terminal sequence shared by all constructs, with the exception of PEP226, is comprised of MBP residues 27-391 (Met start codon, no signal sequence) fused to a linker sequence containing an internal FXa-site, and the natural ProcA3.3-leader sequence (underlined); in PEP226 the linker sequence was replaced by NSSSNNNNNNNNNNGTPGGSGGAPGS to eliminate the FXa-site; XXX indicates core peptide sequences as shown in the individual rows below.

<sup>b</sup> Plasmid trivial name used in this study.

<sup>c</sup> Core peptide sequence with His<sub>6</sub>-tag (shaded).

<sup>d</sup> The N-terminal sequence shared by the two lantibiotic fusions is comprised of MBP residues 27-391 (Met start codon, no signal sequence) fused to a linker sequence containing an internal FXa-site; XXX indicates peptide precursor sequences as shown in the individual rows below.

<sup>e</sup> Precursor sequences consisting of the ProcA3.3 and NisA leader sequences (underlined), the LctA and NisA core peptides (bold), and N-terminal His<sub>6</sub>-tag (shaded).

Supplementary Table 6

| Sequence and mass of prochlorosin lanthipeptides produced as C-terminal MBP fusions |                                                                                                                                          |                                    |                                |                                            |                                 |
|-------------------------------------------------------------------------------------|------------------------------------------------------------------------------------------------------------------------------------------|------------------------------------|--------------------------------|--------------------------------------------|---------------------------------|
| Construct                                                                           | Sequence <sup>a</sup>                                                                                                                    | Sequence mass <sup>b</sup> (g/mol) | No of dehydr. found (possible) | Mass <sup>b</sup> fully dehydrated (g/mol) | Mass <sup>b</sup> found (g/mol) |
| PEP223                                                                              | <u>GSPGGSGGAPGSMSEEQLKAFIAKVQGDSSLQEQLK</u><br><u>AEGADVVAIAKAAGFTIKQQDLNAAASELSDEELEA</u><br><u>ASGGFFFCVQGTANRFITINVCAAAGPHHHHHH</u>   | 10470.4                            | 2 (2)                          | 10434.3                                    | 10434.3                         |
| PEP224                                                                              | <u>GSPGGSGGAPGSMSEEQLKAFIAKVQGDSSLQEQLK</u><br><u>AEGADVVAIAKAAGFTIKQQDLNAAASELSDEELEA</u><br><u>ASGGAAACHNHAPSMPPSYWEGECAAGPHHHHHH</u>  | 10737.6                            | 2 (2)                          | 10701.5                                    | 10701.5                         |
| PEP225                                                                              | <u>GSPGGSGGAPGSMSEEQLKAFIAKVQGDSSLQEQLK</u><br><u>AEGADVVAIAKAAGFTIKQQDLNAAASELSDEELEA</u><br><u>ASGGGRIDTCPAGGGTSEQTGTCCAAAGPHHHHHH</u> | 10564.3                            | 5 (5)                          | 10474.3                                    | 10474.3                         |
| PEP226                                                                              | <b>GAACHNHAPSMPPSYWEGECAAGPHHHHHH</b>                                                                                                    | 3261.3 <sup>c</sup>                | 2 (2)                          | 3225.3 <sup>c</sup>                        | 3225.3 <sup>c</sup>             |

<sup>a</sup> The sequence of the ProcA3.3-leader (underlined), the core peptide (bold), and putative sites of dehydration (double underlined) are highlighted

<sup>b</sup> For peptide > 10 kDa the average mass is shown

<sup>c</sup> For PEP226 (< 10 kDa) the monoisotopic mass is shown

Supplementary Table 7

| Fragments of c-series identified in mass spectra of peptide ProcA2.8 (PEP226) under ETD conditions |                 |                        |           |                        |           |                        |           |
|----------------------------------------------------------------------------------------------------|-----------------|------------------------|-----------|------------------------|-----------|------------------------|-----------|
| Residue <sup>a</sup>                                                                               | Fragment        | $C_n^{1+}$             |           | $C_n^{2+}$             |           | $C_n^{3+}$             |           |
|                                                                                                    |                 | m/z calc. <sup>b</sup> | m/z found | m/z calc. <sup>b</sup> | m/z found | m/z calc. <sup>b</sup> | m/z found |
| G                                                                                                  | C <sub>1</sub>  | 75.06                  |           | 38.03                  |           | 25.69                  |           |
| A                                                                                                  | C <sub>2</sub>  | 146.09                 | 146.13    | 73.55                  |           | 49.36                  |           |
| A                                                                                                  | C <sub>3</sub>  | 217.13                 | 217.15    | 109.07                 |           | 73.04                  |           |
| C                                                                                                  | C <sub>4</sub>  | 320.14                 |           | 160.57                 |           | 107.38                 |           |
| H                                                                                                  | C <sub>5</sub>  | 457.20                 |           | 229.10                 |           | 153.07                 |           |
| N                                                                                                  | C <sub>6</sub>  | 571.24                 |           | 286.12                 |           | 191.09                 |           |
| H                                                                                                  | C <sub>7</sub>  | 708.30                 |           | 354.65                 |           | 236.77                 |           |
| A                                                                                                  | C <sub>8</sub>  |                        |           |                        |           |                        |           |
| P                                                                                                  | C <sub>9</sub>  | 876.39                 |           | 438.70                 |           | 292.80                 |           |
| Dha (S)                                                                                            | C <sub>10</sub> | 945.41                 | 945.44    | 473.21                 | 473.23    | 315.80                 |           |
| M                                                                                                  | C <sub>11</sub> |                        |           |                        |           |                        |           |
| P                                                                                                  | C <sub>12</sub> |                        |           |                        |           |                        |           |
| P                                                                                                  | C <sub>13</sub> | 1270.56                | 1270.56   | 635.78                 | 635.80    | 424.19                 |           |
| Dha (S)                                                                                            | C <sub>14</sub> | 1339.58                |           | 670.29                 |           | 447.20                 |           |
| Y                                                                                                  | C <sub>15</sub> | 1484.63                |           | 742.82                 |           | 495.55                 |           |
| W                                                                                                  | C <sub>16</sub> | 1652.70                |           | 826.85                 |           | 551.57                 |           |
| E                                                                                                  | C <sub>17</sub> | 1763.73                |           | 882.37                 |           | 588.58                 |           |
| G                                                                                                  | C <sub>18</sub> | 1802.74                |           | 901.88                 |           | 601.59                 |           |
| E                                                                                                  | C <sub>19</sub> | 1913.78                |           | 957.39                 |           | 638.60                 |           |
| C                                                                                                  | C <sub>20</sub> | 2106.84                |           | 1053.92                |           | 702.95                 | 702.96    |
| A                                                                                                  | C <sub>21</sub> | 2177.87                |           | 1089.44                | 1089.47   | 726.62                 | 726.65    |
| A                                                                                                  | C <sub>22</sub> | 2248.91                |           | 1124.96                | 1125.00   | 750.30                 | 750.33    |
| G                                                                                                  | C <sub>23</sub> |                        |           |                        |           |                        |           |
| P                                                                                                  | C <sub>24</sub> | 2402.99                |           | 1201.99                | 1202.03   | 801.66                 | 801.69    |
| H                                                                                                  | C <sub>25</sub> | 2540.04                |           | 1270.52                | 1270.56   | 847.35                 | 867.38    |
| H                                                                                                  | C <sub>26</sub> | 2677.10                |           | 1339.05                | 1339.09   | 893.03                 | 893.07    |
| H                                                                                                  | C <sub>27</sub> | 2814.16                |           | 1407.58                | 1407.62   | 938.72                 | 938.76    |
| H                                                                                                  | C <sub>28</sub> | 2951.22                |           | 1476.11                | 1476.17   | 984.41                 | 984.45    |
| H                                                                                                  | C <sub>29</sub> | 3088.28                |           | 1544.64                | 1544.70   | 1030.09                | 1030.12   |
| H                                                                                                  | C <sub>30</sub> | 3225.34                |           | 1613.17                |           | 1075.78                |           |

<sup>a</sup> Ser residues were assumed to be dehydrated (dehydroalanine, Dha) since intact mass measurements indicate double dehydration (-36 Da).

<sup>b</sup> Calculated mass of singly ( $C_n^{1+}$ ), doubly ( $C_n^{2+}$ ) and triply ( $C_n^{3+}$ ) charged c-fragments. Xaa-Pro sites do not give rise to fragments under ETD conditions due to the pyrrolidine structure of the proline side chain. Sequences comprising the proposed thioether ring are highlighted (gray).

Supplementary Table 8

| Fragments of z-series identified in mass spectra of peptide ProcA2.8 (PEP226) under ETD conditions |                 |                        |           |                        |           |                        |           |
|----------------------------------------------------------------------------------------------------|-----------------|------------------------|-----------|------------------------|-----------|------------------------|-----------|
| Residue <sup>a</sup>                                                                               | Fragment        | $z_n^{1+}$             |           | $z_n^{2+}$             |           | $z_n^{3+}$             |           |
|                                                                                                    |                 | m/z calc. <sup>b</sup> | m/z found | m/z calc. <sup>b</sup> | m/z found | m/z calc. <sup>b</sup> | m/z found |
| H                                                                                                  | Z <sub>1</sub>  | 140.05                 | 140.09    | 70.53                  |           | 47.35                  |           |
| H                                                                                                  | Z <sub>2</sub>  | 277.11                 | 277.14    | 139.05                 |           | 93.03                  |           |
| H                                                                                                  | Z <sub>3</sub>  | 414.17                 |           | 207.58                 |           | 138.72                 |           |
| H                                                                                                  | Z <sub>4</sub>  | 551.23                 |           | 276.11                 |           | 184.41                 |           |
| H                                                                                                  | Z <sub>5</sub>  | 688.29                 | 688.31    | 344.64                 | 344.67    | 230.09                 |           |
| H                                                                                                  | Z <sub>6</sub>  | 825.35                 | 825.38    | 413.17                 | 413.19    | 275.78                 |           |
| P                                                                                                  | Z <sub>7</sub>  |                        |           |                        |           |                        |           |
| G                                                                                                  | Z <sub>8</sub>  | 979.42                 |           | 490.21                 | 490.24    | 327.14                 |           |
| A                                                                                                  | Z <sub>9</sub>  | 1050.46                |           | 525.73                 |           | 350.82                 |           |
| A                                                                                                  | Z <sub>10</sub> | 1121.49                |           | 561.25                 | 561.28    | 374.49                 |           |
| C                                                                                                  | Z <sub>11</sub> | 1224.50                |           | 612.76                 |           | 408.84                 |           |
| E                                                                                                  | Z <sub>12</sub> | 1353.55                |           | 677.28                 |           | 451.85                 |           |
| G                                                                                                  | Z <sub>13</sub> | 1410.57                |           | 705.79                 |           | 470.86                 |           |
| E                                                                                                  | Z <sub>14</sub> | 1539.61                |           | 770.31                 |           | 513.88                 |           |
| W                                                                                                  | Z <sub>15</sub> | 1725.69                |           | 863.35                 |           | 575.90                 |           |
| Y                                                                                                  | Z <sub>16</sub> | 1888.75                |           | 944.88                 |           | 630.26                 |           |
| Dha (S)                                                                                            | Z <sub>17</sub> | 1957.77                | 1957.81   | 979.39                 | 979.43    | 653.25                 | 653.30    |
| P                                                                                                  | Z <sub>18</sub> |                        |           |                        |           |                        |           |
| P                                                                                                  | Z <sub>19</sub> |                        |           |                        |           |                        |           |
| M                                                                                                  | Z <sub>20</sub> | 2282.92                | 2282.99   | 1141.96                | 1142.00   | 761.64                 | 761.70    |
| Dha (S)                                                                                            | Z <sub>21</sub> | 2351.94                |           | 1176.47                |           | 784.65                 |           |
| P                                                                                                  | Z <sub>22</sub> |                        |           |                        |           |                        |           |
| A                                                                                                  | Z <sub>23</sub> | 2520.03                |           | 1260.52                |           | 840.68                 |           |
| H                                                                                                  | Z <sub>24</sub> | 2657.09                |           | 1329.05                |           | 886.37                 |           |
| N                                                                                                  | Z <sub>25</sub> | 2771.13                |           | 1386.07                |           | 924.38                 |           |
| H                                                                                                  | Z <sub>26</sub> | 2908.19                |           | 1454.60                |           | 970.07                 |           |
| C                                                                                                  | Z <sub>27</sub> | 3011.20                |           | 1506.10                |           | 1004.40                |           |
| A                                                                                                  | Z <sub>28</sub> | 3082.24                |           | 1541.62                |           | 1028.08                |           |
| A                                                                                                  | Z <sub>29</sub> | 3153.28                |           | 1577.14                | 1577.18   | 1051.76                |           |
| G                                                                                                  | Z <sub>30</sub> | 3210.30                |           | 1605.65                | 1605.71   | 1070.76                | 1070.80   |

<sup>a</sup> Ser residues were assumed to be dehydrated (dehydroalanine, Dha) since intact mass measurements indicate double dehydration (-36 Da).

<sup>b</sup> Calculated mass of singly ( $z_n^{1+}$ ), doubly ( $z_n^{2+}$ ) and triply ( $z_n^{3+}$ ) charged c-fragments. Xaa-Pro sites do not give rise to fragments under ETD conditions due to the pyrrolidine structure of the proline side chain.

Sequences comprising the proposed thioether ring are highlighted (gray).

Supplementary Table 9

Full length mass analysis of selected leader-core peptides released from MBP-fusion protein by Factor Xa digestion and chemically or enzymatically treated as indicated<sup>a</sup>

| Peptide              | Sequence <sup>b</sup>                                                                    | Found m/z | Modification <sup>c</sup><br>(fraction %) <sup>d</sup>       | Calc. m/z | SAP <sup>f</sup><br>found m/z | TCEP <sup>g</sup><br>found m/z | IAA <sup>g</sup><br>found m/z | IAA addition <sup>h</sup><br>(fraction %) <sup>c</sup> | Lanthionine<br>rings |
|----------------------|------------------------------------------------------------------------------------------|-----------|--------------------------------------------------------------|-----------|-------------------------------|--------------------------------|-------------------------------|--------------------------------------------------------|----------------------|
| PEP330               | <u>T</u> NCGRKMS <u>A</u> T <u>Y</u> SGQKMYCIA                                           | 10644.06  | -4x H <sub>2</sub> O (15%)                                   | 10644.07  | 10644.08                      | 10644.07                       | 10644.16                      | 0                                                      | 2                    |
|                      |                                                                                          | 10662.07  | -3x H <sub>2</sub> O (10%)                                   | 10662.08  | 10662.11                      | 10662.05                       | 10662.11                      | 0                                                      | 2                    |
|                      |                                                                                          | 10742.04  | -3x H <sub>2</sub> O + P (75%)                               | 10742.04  | ---                           | 10742.05                       | 10742.07                      | 0                                                      | 2                    |
| PEP331               | <u>A</u> NCIQHL <u>I</u> H <u>S</u> P <u>T</u> VHKYFC <u>P</u> A                         | 10734.18  | -2x H <sub>2</sub> O (100%)                                  | 10734.18  | n.d.                          | 10734.18                       | 10734.16                      | 0                                                      | 2                    |
| PEP332               | <u>A</u> FCMRHH <u>S</u> TR <u>T</u> SENRRDC <u>Q</u> A                                  | 10837.14  | -4x H <sub>2</sub> O (35%)                                   | 10837.15  | n.d.                          | 10837.15                       | 10837.14                      | 0                                                      | 2                    |
|                      |                                                                                          | 10855.13  | -3x H <sub>2</sub> O (55%)                                   | 10855.16  |                               | 10855.16                       | 10855.15                      | 0                                                      | 2                    |
|                      |                                                                                          | 10935.12  | -3x H <sub>2</sub> O + P (10%)                               | 10935.13  | .                             | 10935.13                       | 10935.15                      | 0                                                      | 2                    |
| PEP333               | <u>A</u> ICQIAD <u>A</u> TR <u>T</u> GENRK <u>C</u> LA                                   | 10500.1   | Mix of -2x H <sub>2</sub> O<br>and -2x H <sub>2</sub> O + SS | 10501.12  | n.d.                          | 10501.13                       | 10501.11                      | 0 (15%)                                                | 2                    |
|                      |                                                                                          |           |                                                              | 10499.10  |                               |                                | 10558.13                      | 1 (65%)                                                | 1                    |
|                      |                                                                                          |           |                                                              |           |                               |                                | 10615.09                      | 2 (20%)                                                | 0                    |
| PEP333u <sup>e</sup> | <u>A</u> ICQIAD <u>A</u> TR <u>T</u> GENRK <u>C</u> LA                                   | 10537.12  | reduced                                                      | 10537.14  | n.d.                          | ---                            | 10651.18                      | 2                                                      | 0                    |
| PEP334               | <u>A</u> NCKVRQ <u>S</u> W <u>I</u> R <u>I</u> YENK <u>K</u> CP <u>A</u>                 | 10832.26  | -3x H <sub>2</sub> O (70%)                                   | 10832.26  | n.d.                          | 10832.26                       | 10832.25                      | 0 (80%)                                                | 2                    |
|                      |                                                                                          |           |                                                              |           |                               |                                | 10889.21                      | 1 (20%)                                                | 1                    |
|                      |                                                                                          | 10928.21  | -2x H <sub>2</sub> O + P + SS (15%)                          | 10928.22  |                               | 10930.23                       | 10986.23                      | 1                                                      | 0 <sup>i</sup>       |
|                      |                                                                                          | 11137.28  | -3x H <sub>2</sub> O + GSH + SS (15%)                        | 11137.33  |                               | 11139.35                       | 11196.35                      | 1                                                      | 0 <sup>i</sup>       |
| PEP335               | <u>A</u> WCKWN <u>M</u> <u>T</u> <u>K</u> <u>T</u> K <u>I</u> YEN <u>V</u> Q <u>C</u> KA | 10882.22  | -3x H <sub>2</sub> O (100%)                                  | 10882.24  | n.d.                          | 10888.25                       | 10882.24                      | 0 (40%)                                                | 2                    |
|                      |                                                                                          |           |                                                              |           |                               |                                | 10939.25                      | 1 (60%)                                                | 1                    |

<sup>a</sup> The monoisotopic mass [M+H]<sup>+</sup> is shown.<sup>b</sup> Peptide sequences are shown without the N-terminal ProcA3.3 leader (GSPGGSGGAPGSMSEEQLKAFIAK/VQGDSSLQEQLKAEGADVVAIAKAAGFTIKQQLNAAASELSDEE-LEAASGG) and the C-terminal His<sub>6</sub>-tag (AGPHHHHHH). Putative sites of dehydration are underlined.<sup>c</sup> Modifications found are **-nx H<sub>2</sub>O**; dehydration of Ser and Thr (-H<sub>2</sub>O; -18.01057 Da), **P**; phosphorylation (+HPO<sub>3</sub>; +79.96633 Da), **SS**; disulfide formation (-2H; -2.01565 Da) and **GSH**; glutathione addition (+ 307.083801 Da).<sup>d</sup> The height of the isotopic mass distribution was used to estimate the percentage of each fraction when multiple species are detected.<sup>e</sup> PEP333u is peptide produced in absence of ProcM enzyme (u = unmodified) and was used as internal positive control for the iodoacetamide modification, since it has two free cysteine residues.<sup>f</sup> SAP stands for treatment with shrimp alkaline phosphatase and only sample PEP330 was determined to demonstrate phosphorylation (n.d. is not determined).<sup>g</sup> TCEP was used to reduce the peptide samples to demonstrate the presence of disulfide bridge.<sup>h</sup> IAA stands for iodoacetamide modification of cysteine (+C<sub>2</sub>H<sub>3</sub>NO; + 57.02146 Da). The number of additions and their relative appearance based on isotopic mass distribution peak height is shown. Each reaction tube included PEP333u as a positive control for full IAA modification.<sup>i</sup> Zero lanthionines is indicated here since these peptide species are disulfide-bridged and contain a free dehydroalanine, which reacts promptly with free cysteine at pH 8.

Supplementary Table 10

| Fragments of b- and y-ions in mass spectra of peptide PEP332 under CID conditions <sup>a</sup> |                       |            |           |            |                        |            |           |                               |           |           |           |           |
|------------------------------------------------------------------------------------------------|-----------------------|------------|-----------|------------|------------------------|------------|-----------|-------------------------------|-----------|-----------|-----------|-----------|
| $b_n^{1+}$                                                                                     |                       | $b_n^{2+}$ |           | $y_n^{1+}$ |                        | $y_n^{2+}$ |           | $y_n-2NH_3^{2+}$ <sup>b</sup> |           |           |           |           |
| m/z calc.                                                                                      | m/z found             | m/z calc.  | m/z found | n          | residue                | n          | m/z calc. | m/z found                     | m/z calc. | m/z found | m/z calc. | m/z found |
| ---                                                                                            | ---                   | ---        | ---       | 1          | <b>A</b>               | 25         | ---       | ---                           | ---       | ---       | ---       | ---       |
| 143.082                                                                                        | ---                   | ---        | ---       | 2          | <b>A</b>               | 24         | 2624.152  | ---                           | 1312.580  | ---       | 1295.553  | ---       |
| 230.113                                                                                        | 230.114               | ---        | ---       | 3          | <b>S</b>               | 23         | 2553.115  | ---                           | 1277.061  | ---       | 1260.035  | 1260.039  |
| 287.135                                                                                        | ---                   | ---        | ---       | 4          | <b>G</b>               | 22         | 2466.083  | ---                           | 1233.545  | ---       | 1216.519  | 1216.523  |
| 344.156                                                                                        | 344.156               | ---        | ---       | 5          | <b>G</b>               | 21         | 2409.062  | ---                           | 1205.035  | ---       | 1188.008  | ---       |
| 415.194                                                                                        | 415.194               | ---        | ---       | 6          | <b>A</b>               | 20         | 2352.04   | ---                           | 1176.524  | ---       | 1159.497  | 1159.494  |
| 562.262                                                                                        | 562.267               | ---        | ---       | 7          | <b>F</b>               | 19         | 2281.003  | ---                           | 1141.005  | ---       | 1123.979  | ---       |
| 665.271                                                                                        | ---                   | ---        | ---       | 8          | <b>C</b>               | 18         | 2133.935  | ---                           | 1067.471  | ---       | 1050.445  | ---       |
| 796.312                                                                                        | ---                   | ---        | ---       | 9          | <b>M</b>               | 17         | 2030.926  | ---                           | 1015.967  | ---       | 998.940   | ---       |
| 952.413                                                                                        | ---                   | 476.710    | ---       | 10         | <b>R</b>               | 16         | 1899.885  | ---                           | 950.446   | ---       | 933.420   | ---       |
| 1089.472                                                                                       | ---                   | 545.239    | ---       | 11         | <b>H</b>               | 15         | 1743.784  | ---                           | 872.396   | ---       | 855.369   | ---       |
| 1226.531                                                                                       | ---                   | 613.769    | ---       | 12         | <b>H</b>               | 14         | 1606.725  | ---                           | 803.866   | ---       | 786.840   | ---       |
| 1295.552                                                                                       | 1295.552 <sup>d</sup> | 648.280    | 648.283   | 13         | <b>Dha<sup>c</sup></b> | 13         | 1469.666  | ---                           | 735.337   | ---       | 718.310   | ---       |
| 1378.589                                                                                       | 1378.594              | 689.798    | ---       | 14         | <b>Dhb<sup>c</sup></b> | 12         | 1400.645  | ---                           | 700.826   | 700.827   | 683.800   | 683.800   |
| 1534.690                                                                                       | ---                   | 767.849    | 767.85    | 15         | <b>R</b>               | 11         | 1317.608  | ---                           | 659.307   | 659.310   | 642.281   | ---       |
| 1635.738                                                                                       | ---                   | 818.373    | 818.373   | 16         | <b>T</b>               | 10         | 1161.507  | 1161.513                      | 581.257   | 581.257   | 564.230   | ---       |
| 1704.759                                                                                       | ---                   | 852.883    | ---       | 17         | <b>Dha<sup>c</sup></b> | 9          | 1060.459  | 1060.459                      | 530.733   | ---       | 513.707   | ---       |
| 1833.802                                                                                       | ---                   | 917.405    | ---       | 18         | <b>E</b>               | 8          | 991.437   | ---                           | 496.222   | ---       | 479.196   | ---       |
| 1947.845                                                                                       | ---                   | 974.426    | ---       | 19         | <b>N</b>               | 7          | 862.395   | ---                           | 431.701   | ---       | 414.675   | ---       |
| 2103.946                                                                                       | ---                   | 1052.477   | ---       | 20         | <b>R</b>               | 6          | 748.352   | ---                           | 374.680   | ---       | 357.653   | ---       |
| 2260.047                                                                                       | ---                   | 1130.527   | ---       | 21         | <b>R</b>               | 5          | 592.250   | ---                           | 296.629   | ---       | 279.603   | ---       |
| 2375.074                                                                                       | ---                   | 1188.041   | ---       | 22         | <b>D</b>               | 4          | 436.149   | ---                           | ---       | ---       | ---       | ---       |
| 2478.083                                                                                       | ---                   | 1239.545   | ---       | 23         | <b>C</b>               | 3          | 321.122   | ---                           | ---       | ---       | ---       | ---       |
| 2606.142                                                                                       | ---                   | 1303.575   | ---       | 24         | <b>Q</b>               | 2          | 218.113   | ---                           | ---       | ---       | ---       | ---       |
| ---                                                                                            | ---                   | ---        | ---       | 25         | <b>A</b>               | 1          | 90.055    | ---                           | ---       | ---       | ---       | ---       |

<sup>a</sup> CID (Collision-induced dissociation). The residues highlighted in gray are part of the proposed lanthionine ring.

<sup>b</sup> Due to the presence of 4 Arg residues in the sequence these masses can only be observed with loss of two ammonia.

<sup>c</sup> Dehydrated residue; Dhb (dehydrobutyrine), Dha (dehydroalanine).

<sup>d</sup> A very clear related  $c_{13}^{1+}$ -ion peak was detected (found m/z 1312.578 and calc. m/z 1312.579).

Supplementary Table 11

| Fragments of b- and y-ions identified in mass spectra of peptide PEP334 under CID conditions <sup>a</sup> |           |                              |           |    |                        |                              |           |                              |           |           |  |
|-----------------------------------------------------------------------------------------------------------|-----------|------------------------------|-----------|----|------------------------|------------------------------|-----------|------------------------------|-----------|-----------|--|
| b <sub>n</sub> <sup>1+</sup>                                                                              |           | b <sub>n</sub> <sup>2+</sup> |           |    |                        | y <sub>n</sub> <sup>1+</sup> |           | y <sub>n</sub> <sup>2+</sup> |           |           |  |
| m/z calc.                                                                                                 | m/z found | m/z calc.                    | m/z found | n  | residue                | n                            | m/z calc. | m/z found                    | m/z calc. | m/z found |  |
| ---                                                                                                       |           | ---                          |           | 1  | <b>A</b>               | 24                           | ---       |                              | ---       |           |  |
| 143.081                                                                                                   |           | ---                          |           | 2  | <b>A</b>               | 23                           | 2530.219  |                              | 1265.613  | 1265.621  |  |
| 230.113                                                                                                   | 230.113   | ---                          |           | 3  | <b>S</b>               | 22                           | 2459.182  |                              | 1230.095  | 1230.100  |  |
| 287.135                                                                                                   | 287.135   | ---                          |           | 4  | <b>G</b>               | 21                           | 2372.150  |                              | 1186.580  | 1186.577  |  |
| 344.156                                                                                                   | 344.156   | ---                          |           | 5  | <b>G</b>               | 20                           | 2315.128  |                              | 1158.068  | 1158.056  |  |
| 415.193                                                                                                   | 415.193   | ---                          |           | 6  | <b>A</b>               | 19                           | 2258.107  |                              | 1129.557  | 1129.546  |  |
| 529.236                                                                                                   | 529.239   | ---                          |           | 7  | <b>N</b>               | 18                           | 2187.070  |                              | 1094.039  | 1094.030  |  |
| 632.245                                                                                                   |           | ---                          |           | 8  | <b>C</b>               | 17                           | 2073.027  |                              | 1037.017  | 1037.004  |  |
| 760.340                                                                                                   |           | 380.674                      |           | 9  | <b>K</b>               | 16                           | 1970.018  |                              | 985.513   |           |  |
| 859.409                                                                                                   |           | 430.208                      |           | 10 | <b>V</b>               | 15                           | 1841.923  |                              | 921.465   |           |  |
| 1015.510                                                                                                  |           | 508.258                      |           | 11 | <b>R</b>               | 14                           | 1742.854  |                              | 871.931   |           |  |
| 1143.568                                                                                                  |           | 572.28                       |           | 12 | <b>Q</b>               | 13                           | 1586.753  |                              | 793.880   |           |  |
| 1212.590                                                                                                  |           | 606.798                      |           | 13 | <b>Dha<sup>b</sup></b> | 12                           | 1458.695  |                              | 729.851   |           |  |
| 1398.669                                                                                                  |           | 699.838                      | 699.839   | 14 | <b>W</b>               | 11                           | 1389.673  | 1389.661                     | 695.340   |           |  |
| 1481.706                                                                                                  | 1481.692  | 741.357                      | 741.357   | 15 | <b>Dhb<sup>b</sup></b> | 10                           | 1203.594  | 1203.590                     | 602.301   |           |  |
| 1637.807                                                                                                  |           | 819.407                      | 819.404   | 16 | <b>R</b>               | 9                            | 1120.556  | 1120.545                     | 560.782   |           |  |
| 1720.844                                                                                                  |           | 860.926                      |           | 17 | <b>Dhb<sup>a</sup></b> | 8                            | 964.456   | 964.450                      | 482.732   |           |  |
| 1883.908                                                                                                  |           | 942.457                      |           | 18 | <b>Y</b>               | 7                            | 881.419   |                              | 441.213   |           |  |
| 2012.950                                                                                                  |           | 1006.979                     |           | 19 | <b>E</b>               | 6                            | 718.355   |                              | 359.681   |           |  |
| 2126.993                                                                                                  |           | 1064.001                     |           | 20 | <b>N</b>               | 5                            | 589.313   |                              | 295.160   |           |  |
| 2255.088                                                                                                  |           | 1128.048                     |           | 21 | <b>K</b>               | 4                            | 475.270   |                              | 238.139   |           |  |
| 2383.183                                                                                                  |           | 1192.096                     |           | 22 | <b>K</b>               | 3                            | 347.175   |                              | 174.091   |           |  |
| 2486.192                                                                                                  |           | 1243.600                     |           | 23 | <b>C</b>               | 2                            | 219.080   |                              | ---       |           |  |
| ---                                                                                                       |           | ---                          |           | 24 | <b>P</b>               | 1                            | 116.071   |                              | ---       |           |  |

<sup>a</sup> CID (Collision-induced dissociation). The residues highlighted in gray are part of the proposed lanthionine ring.

<sup>b</sup> Dehydrated residue; Dhb (dehydrobutyrine), Dha (dehydroalanine).

Supplementary Table 12

| Fragments of b- and y-ions identified in mass spectra of peptide PEP335 under CID conditions <sup>a</sup> |           |                                   |           |    |                        |                                   |           |                                   |           |           |  |
|-----------------------------------------------------------------------------------------------------------|-----------|-----------------------------------|-----------|----|------------------------|-----------------------------------|-----------|-----------------------------------|-----------|-----------|--|
| <b>b<sub>n</sub><sup>1+</sup></b>                                                                         |           | <b>b<sub>n</sub><sup>2+</sup></b> |           |    |                        | <b>y<sub>n</sub><sup>1+</sup></b> |           | <b>y<sub>n</sub><sup>2+</sup></b> |           |           |  |
| m/z calc.                                                                                                 | m/z found | m/z calc.                         | m/z found | n  | residue                | n                                 | m/z calc. | m/z found                         | m/z calc. | m/z found |  |
| ---                                                                                                       |           | ---                               |           | 1  | <b>A</b>               | 29                                | ---       |                                   | ---       |           |  |
| 143.082                                                                                                   |           | ---                               |           | 2  | <b>A</b>               | 28                                | 3013.402  |                                   | 1507.205  |           |  |
| 230.114                                                                                                   |           | ---                               |           | 3  | <b>S</b>               | 27                                | 2942.365  |                                   | 1471.686  | 1471.684  |  |
| 287.135                                                                                                   | 287.135   | ---                               |           | 4  | <b>G</b>               | 26                                | 2855.333  |                                   | 1428.170  | 1428.169  |  |
| 344.157                                                                                                   | 344.156   | ---                               |           | 5  | <b>G</b>               | 25                                | 2798.311  |                                   | 1399.659  |           |  |
| 415.194                                                                                                   | 415.193   | ---                               |           | 6  | <b>A</b>               | 24                                | 2741.290  |                                   | 1371.149  | 1371.145  |  |
| 601.273                                                                                                   | 601.273   | ---                               |           | 7  | <b>W</b>               | 23                                | 2670.253  |                                   | 1335.630  | 1335.626  |  |
| 704.282                                                                                                   |           | ---                               |           | 8  | <b>C</b>               | 22                                | 2484.173  |                                   | 1242.590  | 1242.590  |  |
| 832.377                                                                                                   |           | 416.692                           |           | 9  | <b>K</b>               | 21                                | 2381.164  |                                   | 1191.086  |           |  |
| 1018.456                                                                                                  |           | 509.732                           |           | 10 | <b>W</b>               | 20                                | 2253.069  |                                   | 1127.038  |           |  |
| 1132.499                                                                                                  |           | 566.753                           |           | 11 | <b>N</b>               | 19                                | 2066.990  |                                   | 1033.999  |           |  |
| 1263.540                                                                                                  |           | 632.274                           |           | 12 | <b>M</b>               | 18                                | 1952.947  |                                   | 976.977   |           |  |
| 1346.577                                                                                                  | 1346.584  | 673.792                           |           | 13 | <b>Dhb<sup>b</sup></b> | 17                                | 1821.907  |                                   | 911.4570  |           |  |
| 1474.672                                                                                                  | 1474.681  | 737.840                           |           | 14 | <b>K</b>               | 16                                | 1738.869  | 1738.869                          | 869.938   |           |  |
| 1557.709                                                                                                  | 1557.708  | 779.358                           | 799.358   | 15 | <b>Dhb<sup>b</sup></b> | 15                                | 1610.774  | 1601.775                          | 805.891   |           |  |
| 1685.804                                                                                                  | 1685.803  | 843.406                           | 843.406   | 16 | <b>K</b>               | 14                                | 1527.737  | 1527.737                          | 764.372   |           |  |
| 1768.841                                                                                                  |           | 884.924                           |           | 17 | <b>Dhb<sup>b</sup></b> | 13                                | 1399.642  | 1399.643                          | 700.325   |           |  |
| 1931.904                                                                                                  |           | 966.456                           |           | 18 | <b>Y</b>               | 12                                | 1316.605  |                                   | 658.806   |           |  |
| 2060.947                                                                                                  |           | 1030.977                          |           | 19 | <b>E</b>               | 11                                | 1153.542  |                                   | 577.275   |           |  |
| 2174.990                                                                                                  |           | 1087.999                          |           | 20 | <b>N</b>               | 10                                | 1024.499  |                                   | 512.753   |           |  |
| 2274.058                                                                                                  |           | 1137.533                          |           | 21 | <b>V</b>               | 9                                 | 910.456   |                                   | 455.732   |           |  |
| 2402.117                                                                                                  |           | 1201.562                          |           | 22 | <b>Q</b>               | 8                                 | 811.388   |                                   | 406.198   |           |  |
| 2505.126                                                                                                  |           | 1253.067                          |           | 23 | <b>C</b>               | 7                                 | 683.329   |                                   | 342.168   |           |  |
| 2633.220                                                                                                  |           | 1317.114                          |           | 24 | <b>K</b>               | 6                                 | 580.320   | 580.321                           | 290.664   |           |  |
| 2704.258                                                                                                  |           | 1352.633                          |           | 25 | <b>A</b>               | 5                                 | 452.225   | 452.225                           | 226.616   |           |  |
| 2775.295                                                                                                  |           | 1388.151                          |           | 26 | <b>A</b>               | 4                                 | 381.188   | 381.188                           | 191.098   |           |  |
| 2832.317                                                                                                  |           | 1416.662                          |           | 27 | <b>G</b>               | 3                                 | 310.151   | 310.151                           | 155.579   |           |  |
| 2929.370                                                                                                  |           | 1465.188                          |           | 28 | <b>P</b>               | 2                                 | 253.130   | 253.129                           | 127.068   |           |  |
| ---                                                                                                       |           | ---                               |           | 29 | <b>H</b>               | 1                                 | 156.077   |                                   | 78.542    |           |  |

<sup>a</sup> CID (Collision-induced dissociation). The residues highlighted in gray are part of the proposed lanthionine ring.

<sup>b</sup> Dehydrated residue; Dhb (dehydrobutyrine), Dha (dehydroalanine).



Supplementary Table 13

| Fragments of b- and y-ions identified in mass spectra of peptide PEP330 under CID conditions <sup>a</sup> |           |                                   |           |    |                          |    |           |                                   |           |                                   |  |
|-----------------------------------------------------------------------------------------------------------|-----------|-----------------------------------|-----------|----|--------------------------|----|-----------|-----------------------------------|-----------|-----------------------------------|--|
| <b>b<sub>n</sub><sup>1+</sup></b>                                                                         |           | <b>b<sub>n</sub><sup>2+</sup></b> |           |    |                          |    |           | <b>y<sub>n</sub><sup>1+</sup></b> |           | <b>y<sub>n</sub><sup>2+</sup></b> |  |
| m/z calc.                                                                                                 | m/z found | m/z calc.                         | m/z found | n  | residue                  | n  | m/z calc. | m/z found                         | m/z calc. | m/z found                         |  |
| ---                                                                                                       |           | ---                               |           | 1  | <b>A</b>                 | 24 | ---       |                                   | ---       |                                   |  |
| 143.082                                                                                                   |           | ---                               |           | 2  | <b>A</b>                 | 23 | 2342.030  |                                   | 1171.519  | 1171.520                          |  |
| 230.114                                                                                                   |           | ---                               |           | 3  | <b>S</b>                 | 22 | 2270.993  |                                   | 1136.000  | 1136.000                          |  |
| 287.135                                                                                                   |           | ---                               |           | 4  | <b>G</b>                 | 21 | 2183.961  |                                   | 1092.484  | 1092.484                          |  |
| 344.157                                                                                                   | 344.156   | ---                               |           | 5  | <b>G</b>                 | 20 | 2126.939  |                                   | 1063.973  | 1063.976                          |  |
| 427.194                                                                                                   | 427.190   | ---                               |           | 6  | <b>Dhb<sup>b,c</sup></b> | 19 | 2069.918  |                                   | 1035.463  | 1035.463                          |  |
| 541.237                                                                                                   | 541.236   | ---                               |           | 7  | <b>N</b>                 | 18 | 1986.881  |                                   | 993.944   | 993.943                           |  |
| 644.246                                                                                                   |           | ---                               |           | 8  | <b>C</b>                 | 17 | 1872.838  |                                   | 936.922   | 936.922                           |  |
| 701.267                                                                                                   |           | ---                               |           | 9  | <b>G</b>                 | 16 | 1769.828  |                                   | 885.418   |                                   |  |
| 857.368                                                                                                   |           | 429.188                           |           | 10 | <b>R</b>                 | 15 | 1712.807  |                                   | 856.907   |                                   |  |
| 985.463                                                                                                   |           | 493.235                           |           | 11 | <b>K</b>                 | 14 | 1556.706  |                                   | 778.857   |                                   |  |
| 1116.50                                                                                                   |           | 558.756                           |           | 12 | <b>M</b>                 | 13 | 1428.611  |                                   | 714.809   |                                   |  |
| 1185.525                                                                                                  | 1185.512  | 593.266                           | 593.266   | 13 | <b>Dha<sup>b</sup></b>   | 12 | 1297.57   |                                   | 649.289   |                                   |  |
| 1256.562                                                                                                  | 1256.558  | 628.785                           |           | 14 | <b>A</b>                 | 11 | 1228.549  | 1228.552                          | 614.778   |                                   |  |
| 1339.599                                                                                                  |           | 670.303                           |           | 15 | <b>Dhb<sup>b,c</sup></b> | 10 | 1157.512  | 1157.518                          | 579.260   |                                   |  |
| 1502.663                                                                                                  |           | 751.835                           |           | 16 | <b>Y</b>                 | 9  | 1074.475  | 1074.475                          | 537.741   |                                   |  |
| 1571.684                                                                                                  |           | 786.346                           |           | 17 | <b>Dha<sup>b</sup></b>   | 8  | 911.411   |                                   | 456.209   |                                   |  |
| 1628.706                                                                                                  |           | 814.856                           |           | 18 | <b>G</b>                 | 7  | 842.3900  |                                   | 421.699   |                                   |  |
| 1756.764                                                                                                  |           | 878.886                           |           | 19 | <b>Q</b>                 | 6  | 785.368   |                                   | 393.188   |                                   |  |
| 1884.859                                                                                                  |           | 942.933                           |           | 20 | <b>K</b>                 | 5  | 657.310   |                                   | 329.159   |                                   |  |
| 2015.900                                                                                                  |           | 1008.454                          |           | 21 | <b>M</b>                 | 4  | 529.215   |                                   | ---       |                                   |  |
| 2178.963                                                                                                  |           | 1089.985                          |           | 22 | <b>Y</b>                 | 3  | 398.174   |                                   | ---       |                                   |  |
| 2281.972                                                                                                  |           | 1141.490                          |           | 23 | <b>C</b>                 | 2  | 235.111   |                                   | ---       |                                   |  |
| ---                                                                                                       |           | ---                               |           | 24 | <b>I</b>                 | 1  | 132.102   |                                   | ---       |                                   |  |

<sup>a</sup> CID (Collision-induced dissociation). The residues highlighted in gray are part of the proposed lanthionine ring.

<sup>b</sup> Dehydrated residue; Dhb (dehydrobutyrine), Dha (dehydroalanine).

<sup>c</sup> The triple charged phosphorylated species was used to generate these MS/MS data. Phosphorylation is not observed therefore one of these dehydrated residues results from MS/MS induced dephosphorylation.

Supplementary Table 14

| Fragments of b- and y-ions identified in mass spectra of dephosphorylated <sup>b</sup> peptide PEP330 under CID conditions <sup>a</sup> |           |                                   |           |    |                        |    |                                   |           |                                   |           |
|-----------------------------------------------------------------------------------------------------------------------------------------|-----------|-----------------------------------|-----------|----|------------------------|----|-----------------------------------|-----------|-----------------------------------|-----------|
| <b>b<sub>n</sub><sup>1+</sup></b>                                                                                                       |           | <b>b<sub>n</sub><sup>2+</sup></b> |           |    |                        |    | <b>y<sub>n</sub><sup>1+</sup></b> |           | <b>y<sub>n</sub><sup>2+</sup></b> |           |
| m/z calc.                                                                                                                               | m/z found | m/z calc.                         | m/z found | n  | residue                | n  | m/z calc.                         | m/z found | m/z calc.                         | m/z found |
| ---                                                                                                                                     |           | ---                               |           | 1  | <b>A</b>               | 24 | ---                               |           | ---                               |           |
| 143.081                                                                                                                                 |           | ---                               |           | 2  | <b>A</b>               | 23 | 2360.040                          |           | 1180.523                          | 1180.523  |
| 230.113                                                                                                                                 | 230.113   | ---                               |           | 3  | <b>S</b>               | 22 | 2289.003                          |           | 1145.005                          | 1145.005  |
| 287.135                                                                                                                                 | 287.119   | ---                               |           | 4  | <b>G</b>               | 21 | 2201.971                          |           | 1101.489                          | 1101.489  |
| 344.156                                                                                                                                 | 344.156   | ---                               |           | 5  | <b>G</b>               | 20 | 2144.949                          |           | 1072.978                          | 1072.975  |
| 427.194                                                                                                                                 | 427.193   | ---                               |           | 6  | <b>Dhb<sup>b</sup></b> | 19 | 2087.928                          |           | 1044.467                          | 1044.465  |
| 541.236                                                                                                                                 | 541.236   | ---                               |           | 7  | <b>N</b>               | 18 | 2004.891                          | 2004.880  | 1002.949                          | 1002.948  |
| 644.246                                                                                                                                 |           | ---                               |           | 8  | <b>C</b>               | 17 | 1890.848                          | 1890.834  | 945.927                           | 945.925   |
| 701.267                                                                                                                                 |           | ---                               |           | 9  | <b>G</b>               | 16 | 1787.839                          |           | 894.423                           |           |
| 857.368                                                                                                                                 |           | 429.188                           |           | 10 | <b>R</b>               | 15 | 1730.817                          |           | 865.912                           |           |
| 985.463                                                                                                                                 |           | 493.235                           |           | 11 | <b>K</b>               | 14 | 1574.716                          |           | 787.862                           |           |
| 1116.504                                                                                                                                |           | 558.755                           |           | 12 | <b>M</b>               | 13 | 1446.621                          |           | 723.814                           |           |
| 1185.525                                                                                                                                | 1185.521  | 593.266                           | 593.264   | 13 | <b>Dha<sup>b</sup></b> | 12 | 1315.581                          |           | 658.294                           |           |
| 1256.562                                                                                                                                | 1256.557  | 628.785                           | 628.783   | 14 | <b>A</b>               | 11 | 1246.559                          | 1246.559  | 623.783                           |           |
| 1357.610                                                                                                                                |           | 679.309                           |           | 15 | <b>T<sup>c</sup></b>   | 10 | 1175.522                          | 1175.521  | 588.265                           |           |
| 1520.673                                                                                                                                |           | 760.840                           |           | 16 | <b>Y</b>               | 9  | 1074.474                          |           | 537.741                           |           |
| 1589.695                                                                                                                                |           | 795.351                           |           | 17 | <b>Dha<sup>b</sup></b> | 8  | 911.411                           |           | 456.209                           |           |
| 1646.716                                                                                                                                |           | 823.862                           |           | 18 | <b>G</b>               | 7  | 842.389                           |           | 421.698                           |           |
| 1774.775                                                                                                                                |           | 887.891                           |           | 19 | <b>Q</b>               | 6  | 785.368                           |           | 393.1898                          |           |
| 1902.870                                                                                                                                |           | 951.938                           |           | 20 | <b>K</b>               | 5  | 657.309                           |           | 329.158                           |           |
| 2033.910                                                                                                                                |           | 1017.459                          |           | 21 | <b>M</b>               | 4  | 529.214                           |           | ---                               |           |
| 2196.974                                                                                                                                |           | 1098.990                          |           | 22 | <b>Y</b>               | 3  | 398.174                           |           | ---                               |           |
| 2299.983                                                                                                                                |           | 1150.495                          | 1150.508  | 23 | <b>C</b>               | 2  | 235.111                           |           | ---                               |           |
| ---                                                                                                                                     |           | ---                               |           | 24 | <b>I</b>               | 1  | 132.101                           |           | ---                               |           |

<sup>a</sup> CID (Collision-induced dissociation). The residues highlighted in gray are part of the proposed lanthionine ring.

<sup>b</sup> Dehydrated residue; Dhb (dehydrobutyrine), Dha (dehydroalanine).

<sup>c</sup> Enzymatic dephosphorylation prior to MS/MS measurement results in a Thr residue instead of MS/MS breakdown product Dhb.

Supplementary Table 15

Fragments of b- and y-ions in mass spectra of peptide PEP331 under CID conditions<sup>a</sup>

| $b_n^{1+}$ |           | $b_n^{2+}$ |           | n  | residue                | n  | $y_n^{1+}$ |           | $y_n^{2+}$ |           |
|------------|-----------|------------|-----------|----|------------------------|----|------------|-----------|------------|-----------|
| m/z calc.  | m/z found | m/z calc.  | m/z found |    |                        |    | m/z calc.  | m/z found | m/z calc.  | m/z found |
| ---        |           | ---        |           | 1  | <b>A</b>               | 29 | ---        |           | ---        |           |
| 143.082    |           | ---        |           | 2  | <b>A</b>               | 28 | 2865.346   |           | 1433.177   | 1433.178  |
| 230.114    |           | ---        |           | 3  | <b>S</b>               | 27 | 2794.309   |           | 1397.658   | 1397.658  |
| 287.135    | 287.135   | ---        |           | 4  | <b>G</b>               | 26 | 2707.277   |           | 1354.142   | 1354.142  |
| 344.156    | 344.156   | ---        |           | 5  | <b>G</b>               | 25 | 2650.255   |           | 1325.631   | 1325.628  |
| 415.194    | 415.193   | ---        |           | 6  | <b>A</b>               | 24 | 2593.234   |           | 1297.121   | 1297.119  |
| 529.236    | 529.236   | ---        |           | 7  | <b>N</b>               | 23 | 2522.197   |           | 1261.602   | 1261.600  |
| 632.246    |           | ---        |           | 8  | <b>C</b>               | 22 | 2408.154   |           | 1204.581   | 1204.578  |
| 745.330    |           | ---        |           | 9  | <b>I</b>               | 21 | 2305.145   |           | 1153.076   |           |
| 873.388    |           | ---        |           | 10 | <b>Q</b>               | 20 | 2192.061   |           | 1096.534   |           |
| 1010.447   |           | 505.727    |           | 11 | <b>H</b>               | 19 | 2064.002   |           | 1032.505   |           |
| 1123.531   |           | 562.269    |           | 12 | <b>L</b>               | 18 | 1926.943   |           | 963.9752   |           |
| 1206.568   | 1206.568  | 603.788    |           | 13 | <b>Dhb<sup>b</sup></b> | 17 | 1813.859   |           | 907.433    |           |
| 1343.627   | 1343.630  | 672.317    | 672.317   | 14 | <b>H</b>               | 16 | 1730.822   | 1730.819  | 865.914    | 865.913   |
| 1430.659   | 1430.659  | 715.833    | 715.832   | 15 | <b>S</b>               | 15 | 1593.763   | 1593.760  | 797.385    | 797.384   |
| 1527.712   |           | 764.360    | 764.386   | 16 | <b>P</b>               | 14 | 1506.731   | 1506.730  | 753.869    | 753.868   |
| 1610.749   |           | 805.878    |           | 17 | <b>Dhb<sup>b</sup></b> | 13 | 1409.678   |           | 705.343    | 705.342   |
| 1709.818   |           | 855.412    |           | 18 | <b>V</b>               | 12 | 1326.641   |           | 663.824    |           |
| 1846.877   |           | 923.942    |           | 19 | <b>H</b>               | 11 | 1227.573   |           | 614.290    |           |
| 1974.972   |           | 987.989    |           | 20 | <b>K</b>               | 10 | 1090.514   |           | 545.760    |           |
| 2138.035   |           | 1069.521   |           | 21 | <b>Y</b>               | 9  | 962.419    |           | 481.713    |           |
| 2285.103   |           | 1143.055   |           | 22 | <b>F</b>               | 8  | 799.356    |           | 400.181    |           |
| 2388.113   |           | 1194.560   | 1194.560  | 23 | <b>C</b>               | 7  | 652.287    |           | 326.647    |           |
| 2485.165   |           | 1243.086   | 1243.086  | 24 | <b>P</b>               | 6  | 549.278    | 549.277   | 275.142    |           |
| 2556.202   |           | 1278.605   | 1278.603  | 25 | <b>A</b>               | 5  | 452.225    | 452.225   | 226.616    |           |
| 2627.239   |           | 1314.123   | 1314.123  | 26 | <b>A</b>               | 4  | 381.188    | 381.187   | 191.098    |           |
| 2684.261   |           | 1342.634   | 1342.634  | 27 | <b>G</b>               | 3  | 310.151    | 310.150   | 155.579    |           |
| 2781.314   |           | 1391.161   |           | 28 | <b>P</b>               | 2  | 253.130    |           | 127.068    |           |
| ---        |           | ---        |           | 29 | <b>H</b>               | 1  | 156.077    |           | 78.542     |           |

<sup>a</sup> CID (Collision-induced dissociation). The residues highlighted in gray are part of the proposed lanthionine ring.

<sup>b</sup> Dehydrated residue; Dhb (dehydrobutyrine).

**Supplementary Table 16:****List of primers used (in 5' to 3' direction)**

---

|         |                                                                                                     |
|---------|-----------------------------------------------------------------------------------------------------|
| JUB-001 | GTTTCCTAGGGTTATTGTCTCATGAGCGGATAC                                                                   |
| JUB-002 | GTTTACTAGTGTGCTACATTTGAAGAGATAAATTG                                                                 |
| JUB-012 | GTTTAACTTTAATAAGGAGATATAACCATG                                                                      |
| JUB-013 | ATCTCCTTCTTAAAGTTAAACAAAGTTATTCTCATTTCCTCTTCCCTCC                                                   |
| JUB-014 | CTTTGTTTAACTTTAAGAAGGAGATATACATATGGGCTATCCGTATGATGTGCCGATTATGCGAG<br>CGGCATAAAAAGTTCATTTAAAGCTCAACC |
| JUB-015 | GTTTTACGCGTTCATTTTCATGTATTCTTCCGAAAC                                                                |
| JUB-016 | GTTTTGGTACCATGGGCGAACAGAACTGATTAGCGAAGAAGATCTGAGCGGCGAAAGTCCAAATA<br>AAAAAATATAAAAAGAAATGTTGA       |
| JUB-019 | GTTTTGGCGCCGATTTTGATTATGAAAAAATGGC                                                                  |
| JUB-020 | GTTTTAAGCTTATCAAGACTCCTTATTACGCAGTATGTTAG                                                           |
| JUB-023 | GCTAACATACTGCGTAATAAGGAG                                                                            |
| JUB-024 | GTTTTGGATCCCGCACTTCCACCGCCCGCGCCTGCGCTACGGTAGC                                                      |
| JUB-007 | GTTTTGGTACCATGGAAAGTCCATCATCTTGAAAAAC                                                               |
| JUB-009 | GTTTTGGCGCGCCTTATTCAGTAGGCCAGAGACCAG                                                                |
| JUB-071 | GTTTTGGTACCTTATTCAGTAGGCCAGAGACC                                                                    |
| JUB-072 | GTTTTCATATGGAAAGTCCATCATCTTGAAAAAC                                                                  |
| JUB-136 | GTTTTCCTAGGGTACGGGTTTTGC                                                                            |
| JUB-137 | GGTTTCTTAGACGTCAGGTG                                                                                |
| JUB-225 | Biotin~GCAGCGCAGAAACCGATCG                                                                          |
| JUB-230 | GTCGACGACCTGTGAAGTGAAAAATGG                                                                         |
| JUB-231 | AAGCTTTTATCAGTCTGCTCCTCG                                                                            |
| JUB-248 | Biotin~CGTCGACAAGCTTTCATTAGTG                                                                       |

---

## Supplementary Methods

### Bioactivity assay

Sequences encoding the NisA precursor from *L. lactis* or a chimera consisting of the ProcA3.3 leader peptide fused to the LctA core peptide<sup>1</sup> were fused to the MBP gene via a linker that encodes an FXa cleavage site followed by a His<sub>6</sub>-tag, resulting in plasmids pET21a\_MBP\_His<sub>6</sub>\_NisA and pET21a\_MBP\_His<sub>6</sub>\_ProcA-LctA, respectively. Heterologous production of MBP-fusions in *E. coli* and purification of leader-core peptides with N-terminal His<sub>6</sub>-tag was performed as described above. In brief, pET21a\_MBP\_FXa\_NisA was produced with and without co-expression of the NisBC enzymes, whereas pET21a\_MBP\_FXa\_ProcA-LctA was produced with and without co-expression of the ProcM enzyme. Following purification of the MBP-fusions by Dextrin-Sepharose affinity chromatography and FXa-digest, the released His<sub>6</sub>-tagged leader-core peptides were purified by IMAC and adjusted to a final concentration of 20 µM in PBS. Core peptides were released by treatment with 5 µM Trypsin (Sigma) for 3 h at 37°C followed by 10 h at 30°C and heat-inactivation at 99°C for 5 min. 40 µl of the resulting peptide solutions were directly spotted onto filter discs placed on solidified top-agar solutions containing appropriate indicator strain bacteria. Trypsin-treated PBS served as negative control. To assess the bioactivity of NisA (derived from pET21a\_MBP\_His<sub>6</sub>\_NisA production) a stationary phase *L. lactis* NZ9000 culture grown in GM17 media was diluted 1:25 into 15 ml GM17 top-agar and poured onto a 30 ml layer of bacteria-free GM17 agar. Authentic nisin was obtained from the cell-free supernatant of an *L. lactis* NZ9700 overnight culture grown in G17 media and served as positive control. To assess the bioactivity of the ProcA-LctA chimera (derived from pET21a\_MBP\_His<sub>6</sub>\_ProcA-LctA production) a stationary phase *L. lactis* subsp. *cremonis* (HP) culture grown in M92 media was diluted 1:25 into 15 ml M92 top-agar and poured onto a 30 ml layer of bacteria-free M92 agar. Authentic lacticin 481 was obtained from the cell-free supernatant of an *L. lactis cremonis* CNRZ 481 overnight culture grown in M92 media and served as positive control.

## **Determination of inhibitory activity of lanthipeptides**

The inhibitory activities of ProcM-modified and non-modified anti-uPA peptides were determined as previously described<sup>2</sup>. In brief, 1.5 nM human uPA (ProsPec, # enz-264-c; purified by size exclusion chromatography) were incubated with 50  $\mu$ M of the fluorogenic substrate Z-Gly-Gly-Arg 7-amido-4-methylcoumarin hydrochloride (Santa Cruz Biotechnology, # sc-208012) and different concentrations of anti-uPA peptides. Substrate and peptides were diluted in 10 mM Tris-HCl (pH 7.4), 150 mM NaCl, 10 mM MgCl<sub>2</sub>, 1 mM CaCl<sub>2</sub>, 0.1% (w v<sup>-1</sup>) BSA, 0.01% Triton X-100, 5% (v v<sup>-1</sup>) DMSO buffer. The uPA activity was measured by monitoring the change in fluorescence intensity after an incubation step at 25°C for 30 minutes (black 96 well plate with clear flat bottom, Corning CellBIND, # 3340; excitation at 355 nm, emission recorded at 460 nm, Tecan M200pro, Thermo Scientific). A final inhibition constant  $K_i$  for PEP333 of 564 nM was calculated as previously reported<sup>2</sup>.

## **Analysis of phage-selected peptides by mass spectrometry**

Samples were analyzed by FTMS using a Shimadzu UFLC system (Shimadzu, Den Bosch, The Netherlands) coupled on-line via the HESI interface with a LTQ–Orbitrap-XL mass spectrometer (Thermo Fisher Scientific., San Jose, CA). Samples were loaded onto an Acquity UPLC, BEH C18. 50 x 2.1mm, 1.7 $\mu$ M (Waters, Ireland). The following mobile phase gradient was delivered at the flow rate of 0.3 ml min<sup>-1</sup>: 5% solvent B for 1 min hold; linear gradient 5–95% solvent B in 10 min; 95% solvent B for 2 min. Solvent A was H<sub>2</sub>O with 0.1% formic acid and solvent B was acetonitrile with 0.1% formic acid. The column temperature was kept constant at 60 °C. Typical spray voltage was 3 kV (heater 300 °C, sheath gas flow 40 and auxiliary gas flow 10 (arbitrary units); ion transfer tube temperature was 300 °C. Analysis consisted of full MS scans from m z<sup>-1</sup> 380-2000 at the Orbitrap analyzer with target mass resolution of 100.000 (FWHM, full width at half maximum at m z<sup>-1</sup> 400). The proportion of the full scan chromatogram corresponding to the peptide signal(s) was summed and mass spectra were extracted in Xcalibur v4.0 software before being deconvoluted using the Xtract

algorithm to give singly charged monoisotopic masses and the single charged isotopic patterns. HPLC-MS/MS analysis of leader-free and His<sub>6</sub>-tag free samples was performed using a Thermo/Dionex UltiMate UPLC coupled to a Thermo Q-Exactive mass spectrometer using the same gradient and column as mentioned above. Targeted MS/MS was predominantly performed on preselected triply charged ions at a resolution of at least 17500 @  $m/z^{-1}$  200. Leader peptides were removed from peptides PEP330, PEP331, PEP332, PEP333, PEP334 and PEP335 by mild digestion with endoproteinase Glu-C (Sigma) in a 50 mM sodium phosphate buffer pH 7.6. The shortened peptides with a small part of the leader (AASGG) still attached were purified by HPLC on a Jupiter 4 $\mu$  Proteo 90Å column 250 x 4.6 mm (Phenomenex) with a gradient of water and acetonitrile with both eluents containing 0.1% trifluoroacetate. The fraction containing the shortened peptide was dried in a vacuum concentrator. In order to obtain useful MS/MS data the linker-His<sub>6</sub>-tag sequences were removed by using carboxypeptidase Y from (CPY) from Roche in a 50 mM Tris-HCl pH 7.4 buffer at 25 °C. Samples were 10 times diluted in 0.1% formic acid before analysis by HPLC-MS/MS. Iodoacetamide that alkylates free cysteine residues was used to demonstrate whether thioether rings have been formed. PEP333u, a peptide without modifications that was produced in the absence of the ProcM enzyme was included in each reaction tube. 20  $\mu$ g of peptide and 10  $\mu$ g of unmodified control PEP333u was dissolved in 100  $\mu$ l of 100 mM ammonium bicarbonate buffer (ABC) pH 8.0 in the presence of 10 mM Tris(2-carboxyethyl) phosphine hydrochloride (TCEP-HCl) final concentration. The sample was incubated for 30 min at 37 °C and subsequently 5  $\mu$ l of a freshly prepared 375 mM iodoacetamide (IAA) in 100 mM ABC was added to each sample and incubated for 30 min at room temperature in the dark. Samples were immediately diluted 10 times in 0.1% formic acid and analyzed by LC-MS. The full length and shortened peptide PEP330 was treated with shrimp alkaline phosphatase (SAP, Sigma) to demonstrate phosphorylation. 10  $\mu$ g of peptide was dissolved in 100  $\mu$ l of the supplied buffer and 5 units of SAP was added. The reaction was incubated at 37 °C for 3 hours. Samples were immediately diluted 10 times in 0.1% formic acid and analyzed by LC-MS.

## Supplementary References

1. Zhang, Q., Yu, Y., Vélasquez, J.E. & van der Donk, Wilfred A. Evolution of lanthipeptide synthetases. *Proceedings of the National Academy of Sciences of the United States of America* **109**, 18361–18366 (2012).
2. Chen, S. *et al.* Bicyclic Peptide Ligands Pulled out of Cysteine-Rich Peptide Libraries. *J. Am. Chem. Soc.* **135**, 6562–6569 (2013).
3. Li, B. *et al.* Catalytic promiscuity in the biosynthesis of cyclic peptide secondary metabolites in planktonic marine cyanobacteria. *Proceedings of the National Academy of Sciences of the United States of America* **107**, 10430–10435 (2010).
4. Chatterjee, C. *et al.* Lactacin 481 synthetase phosphorylates its substrate during lantibiotic production. *Journal of the American Chemical Society* **127**, 15332–15333 (2005).
